1 **Translational contributions to tissue-specificity in rhythmic and constitutive gene**  
2 **expression**

3 Violeta Castelo-Szekely<sup>1</sup>, Alaaddin Bulak Arpat<sup>1,2</sup>, Peggy Janich<sup>1</sup>, David Gatfield<sup>1,\*</sup>

4 <sup>1</sup> Center for Integrative Genomics, Génopode, University of Lausanne, and <sup>2</sup> Vital-IT, Swiss Institute of  
5 Bioinformatics, 1015 Lausanne, Switzerland

6 \* corresponding author: david.gatfield@unil.ch

7 Tel. +41 21 6923994

8 Fax. +41 21 6923905

9 Running title: Cross-organ analysis of translation

10 Keywords: circadian clocks, translation, ribosome profiling, kidney, liver

## 11 **Abstract**

12 Gene expression oscillations constitute the molecular basis of circadian rhythms in mammalian physiology  
13 and behavior. Two molecularly poorly understood aspects of rhythmic gene expression are (1) its striking  
14 tissue-specificity and (2) the contribution of post-transcriptional mechanisms to the generation of mRNA  
15 and protein abundance oscillations. We have used ribosome profiling in mouse kidney to quantify the  
16 translation of mRNAs into protein transcriptome-wide and around-the-clock, and we have compared the  
17 protein biosynthesis rates in this organ with those from the livers of the same cohort of animals that we  
18 reported on recently. Our analyses revealed a small set of constantly abundant transcripts in kidney (<100  
19 genes) that underwent daily rhythms in translation. Interestingly, these translational oscillations were  
20 almost exclusively tissue-specific, as neither the identity of genes showing this phenomenon, nor the  
21 global phase distribution of translational rhythms were shared between the two organs. The analysis of  
22 the rhythmically abundant transcripts in both tissues further revealed organ specificity in the relative  
23 timing of translational vs. RNA abundance oscillations, as well as in the protein biosynthetic output of core  
24 clock genes. Finally, our transcriptome-wide data uncovered marked tissue-specificity in translation rates  
25 across constitutively expressed genes. Although in magnitude less divergent than mRNA abundances,  
26 translation efficiency was identified as an important contributor to tissue-specificity in gene expression  
27 levels. Notably, we detected a clear signature of compensation of RNA expression differences at the  
28 translational level, leading globally to higher concordance across organs at the level of ribosome  
29 footprints than of RNA abundances.

30 Reviewer link to deposited data: [available on request]

## 31 Introduction

32 Circadian clocks serve organisms to anticipate daily recurring changes of the environment and to  
33 synchronize behavior, physiology and gene expression according to time of day. In mammals, the  
34 circadian system consists of a master clock in the brain's suprachiasmatic nuclei (SCN) that receives photic  
35 inputs from the retina and synchronizes peripheral clocks present in most cells throughout the body. The  
36 molecular timekeeping mechanism – the core clock – relies on a network of transcriptional activators and  
37 repressors interacting in negative feedback loops (reviewed in (Dibner et al. 2010; Partch et al. 2014)). In  
38 the core loop, the heterodimeric transcription factor ARNTL:CLOCK drives the expression of its own  
39 repressors, encoded by the *Period* (*Per1*, *Per2*, *Per3*) and *Cryptochrome* (*Cry1*, *Cry2*) genes – a  
40 configuration also known as the positive and negative limbs of the oscillator. Additional feedback – in  
41 particular an interconnecting limb involving nuclear receptors of the REV-ERB (encoded by genes *Nr1d1*,  
42 *Nr1d2*) and ROR (*Rora*, *Rorb*, *Rorc*) family – intersects with the core loop, and numerous post-translational  
43 modifications of clock proteins further add to the complexity of the circuitry. The final outcome is a set of  
44 robustly cycling transcriptional activities peaking at different phases of the day that drive the rhythmic  
45 expression of hundreds to thousands of other genes, known as the clock output or clock-controlled genes  
46 (CCGs). It is noteworthy that, despite the probably (near-)identical molecular makeup of the core clock  
47 across cell types, CCGs show considerable tissue-specificity (Zhang et al. 2014). The co-regulation by core  
48 clock and tissue-specific (non-rhythmic) transcription factors may engender such cell type-specific  
49 rhythmic expression patterns, as shown to occur in *Drosophila* (Meireles-Filho et al. 2014). Overall,  
50 however, the origins of tissue-specificity in rhythmic gene output (and even in certain core clock  
51 parameters (Yoo et al. 2004)) are poorly understood and an active field of research. Mechanisms that act  
52 at the post-transcriptional level and that impact daily mRNA and protein accumulation kinetics are  
53 plausible players in the generation of cell type differences as well.

54 So far, oscillatory gene expression has been mainly investigated at the transcriptome level i.e., using  
55 mRNA abundances as a primary readout. However, comparison of mRNA levels with genome-wide  
56 transcriptional activity and protein abundance data that has become available more recently, has  
57 suggested that a surprisingly large fraction of gene expression oscillations may have post-transcriptional

58 origins (reviewed in (Luck and Westermarck 2016)). The many cases of protein rhythms that are  
59 independent of an underlying oscillating transcript – an observation initially reported in a low-throughput  
60 mass-spectrometric study from mouse liver already 10 years ago (Reddy et al. 2006) and recently  
61 confirmed at a comprehensive scale (Mauvoisin et al. 2014; Robles et al. 2014) – point to important roles  
62 for translation, protein degradation and protein secretion in shaping time of day-dependent proteomes.  
63 We (Janich et al. 2015) and others (Atger et al. 2015) have recently used ribosome profiling, a genome-  
64 wide method that assesses translation efficiency through the deep sequencing of ribosome-protected  
65 mRNA fragments, to chart the contribution of translational control to daily protein biosynthesis in mouse  
66 liver. From the identified cases of translationally generated protein oscillations it could be concluded that  
67 circadian clock activity and feeding rhythms both contribute to the regulation of rhythmic gene expression  
68 output (Atger et al. 2015; Janich et al. 2015). Notably, the most abundant group of transcripts subject to  
69 rhythmic translation, i.e. mRNAs encoding ribosomal proteins and other components of the translation  
70 machinery, which all contain 5'-terminal oligopyrimidine tract (5'-TOP) sequences responsive to the  
71 mammalian target of rapamycin (mTOR) regulation (Jouffe et al. 2013), appear to be under the dominant  
72 control of feeding (Atger et al. 2015).

73 Analogous to our liver datasets (Janich et al. 2015), we have now generated ribosome profiling data from  
74 a second organ from the same cohort of animals, the kidney, which is an emerging circadian model organ  
75 with distinct rhythmic functions (Bonny et al. 2013). By comparing kidney and liver datasets we  
76 comprehensively assessed commonalities and differences in the translomes, and we evaluated in how  
77 far the regulation of translation efficiency contributed to tissue-specificity in rhythmic and constitutive  
78 protein biosynthesis.

## 79 **Results**

### 80 **Around-the-clock ribosome profiling datasets from two organs**

81 For our recent study of the mouse liver translome around-the-clock (Janich et al. 2015) we had used the  
82 method ribosome profiling (RPF-seq) on a time series of organs collected from animals sacrificed every 2  
83 hours over the 24-hour day (12 timepoints in duplicate; Fig. 1A). In order to generate a complementary

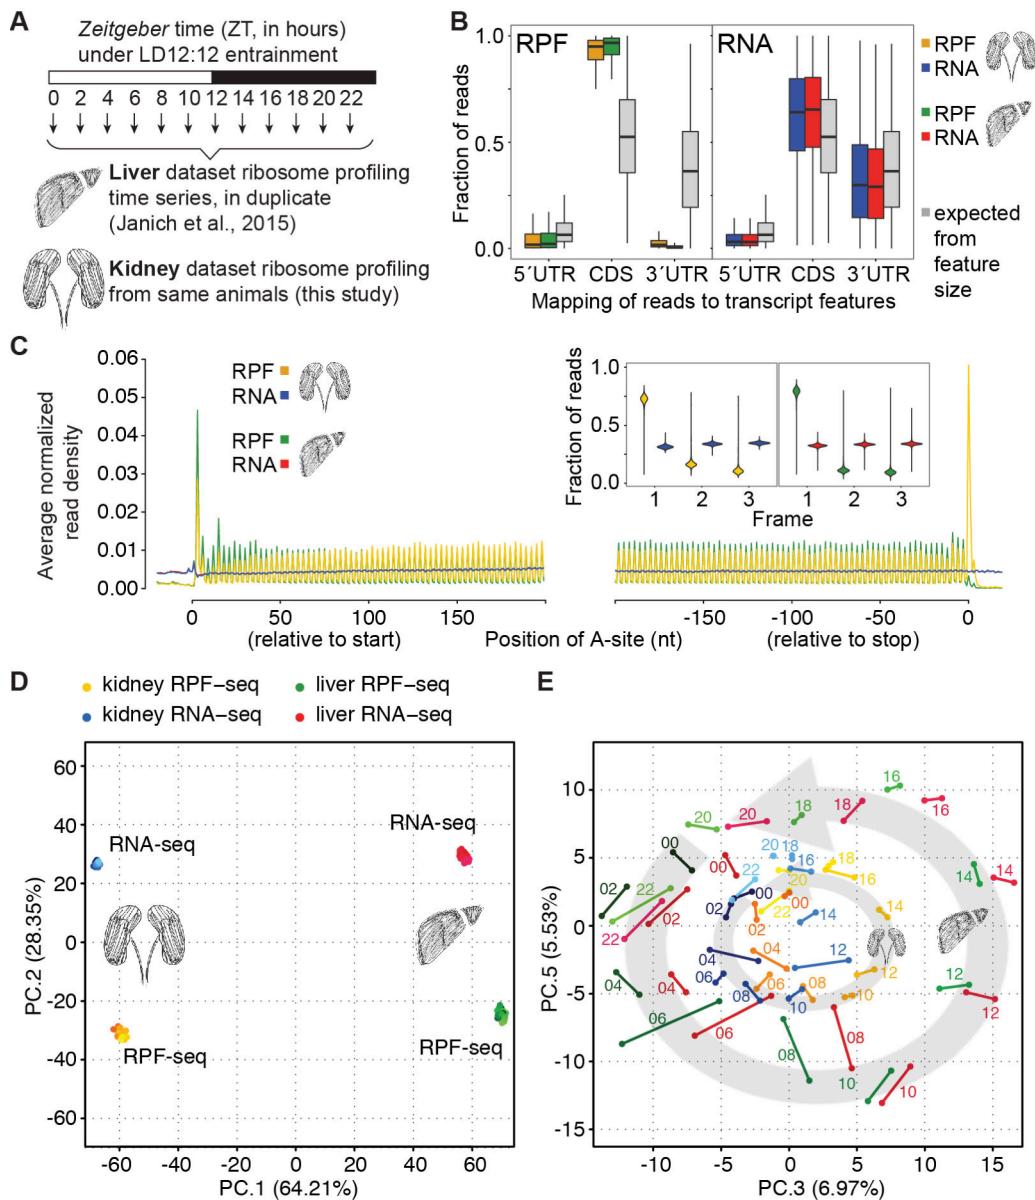

**Figure 1. Ribosome profiling around-the-clock in mouse liver and kidney.**

**(A)** Overview of the experimental design: livers and kidneys from the same mice were collected every 2 hours for two daily cycles and ribosome profiling was performed. Each timepoint sample was a pool of two mice livers or kidneys. Animals were kept under 12 hour:12 hour light-dark conditions, with *Zeitgeber* times ZT00 corresponding to lights-on and ZT12 to lights-off. **(B)** Read distribution within the transcripts' 5' UTRs, CDS and 3' UTRs for RPF-seq (left; yellow and green for kidney and liver, respectively) and RNA-seq (right; blue and red for kidney and liver, respectively) compared to a distribution expected from the relative feature sizes (grey). As the distributions based on the feature sizes were highly similar for both organs, only that for one organ (kidney) is shown. Note that RPF-seq footprints were enriched on the CDS and depleted from UTRs, whereas RNA-seq reads distributed more homogeneously along the transcript, according to feature size. **(C)** Predicted position of the ribosome's aminoacyl tRNA-site (A-site) of reads relative to the CDS start and stop codons. Read density at each position was averaged across single protein isoform genes (i.e. genes with one expressed transcript isoform) that had an average RPF RPKM > 5, a CDS > 400 nt in length and were expressed in both organs (n=3037 genes). This analysis revealed the trinucleotide periodicity of RPF-seq (but not RNA-seq) reads in both organs. *Inset*: Frame analysis of CDS reads showed preference for the annotated reading frame (i.e. frame 1) in RPF but not RNA-seq reads. Violin plots extend to the range of the data (n=3694 genes for liver, n=4602 genes for kidney). **(D)** Principal component (PC) analysis of kidney and liver RPF-seq and RNA-seq datasets, using the top-4000 most variable genes. The first two components reflected the variability coming from organ (64.21%) and from RPF/RNA origin of datasets (28.35%). **(E)** PC3 vs. PC5 (together 12.5% of variation) sequentially resolved the factor time within each dataset, resembling the face of a clock. Each dot represents a timepoint sample, replicates are joined by a line and timepoints within each dataset are sequentially colored. The circular arrangement of the liver data was larger than that of kidney, indicating a higher contribution of hepatic rhythmic genes to overall variability. A scree plot of the ten first PCs and a representation of PC4 can be found in Supplemental Fig. S3.

85 dataset from a second organ we chose the kidneys from the same cohort of animals. Liver and kidney  
86 express thousands of genes in common (Brawand et al. 2011; Zhang et al. 2014), thus providing a  
87 particularly suitable setting for a cross-organ comparison of translation rates.

88 Applying the same experimental and computational methods as for liver RPF-seq (Janich et al. 2015;  
89 Janich et al. 2016), we obtained comparable high-quality data for kidney (see Supplemental Table S1 and  
90 Supplemental Fig. S1A-C for details on sequencing and mapping outcomes). Briefly, ribosome footprints  
91 from both organs were similarly enriched for protein coding sequences (CDS) of mRNAs and depleted  
92 from untranslated regions (UTRs) (Fig. 1B). Like the footprints from liver, also those from kidney exhibited  
93 excellent reading frame preference, which allowed resolving the 3-nt periodicity of coding sequences  
94 transcriptome-wide (Fig. 1C). Moreover, the high correlation coefficients seen across replicates of the  
95 kidney time series for both RNA- and RPF-seq data indicated excellent biological and technical  
96 reproducibility (Supplemental Fig. S2A-B). Finally, principal component (PC) analysis on all available  
97 datasets (96 libraries, i.e. RPF-seq and RNA-seq from 2 organs, over 12 timepoints, and in duplicate)  
98 segregated the data according to the main experimental and biological covariates. PC1 (explaining 64.2%  
99 of variation) thus separated libraries according to organ, indicating that tissue origin represented the  
100 major source of variability, followed by PC2 (28.4%) that separated RNA-seq (mRNA abundance) and RPF-  
101 seq (footprints/translation) (Fig. 1D). The cyclic nature of the data was resolved in the PC3 (6.97% of  
102 variation) vs. PC5 (5.53% of variation) representation, in which timepoints assembled to a near-perfect  
103 clock (Fig. 1E). The larger circular arrangement of the liver vs. kidney time series suggested that rhythmic  
104 gene expression in the liver contributed more strongly to overall variation than did kidney rhythms. This  
105 observation is in line with the notion that there are more rhythmic transcripts in liver than in kidney and  
106 that hepatic oscillations are overall of higher amplitude (Zhang et al. 2014). Of the further components of  
107 the PCA (Supplemental Fig. S3A), PC4 (5.94% of variation) was remarkable as it grouped RNA-seq from one  
108 organ with RPF-seq from the other organ (Supplemental Fig. S3B). A plausible interpretation of this  
109 observation was the occurrence of translational buffering, which has recently been described in other  
110 systems (McManus et al. 2014; Schafer et al. 2015) and which compensates divergent RNA expression to  
111 lead to higher similarity at the level of protein biosynthesis (i.e., ribosome footprints). Taken together, we

112 concluded that the kidney data were of similar high quality as our previous liver datasets (Janich et al.  
 113 2015) and would be suitable for comparative analyses of time of day-dependent and constitutive  
 114 translation across two tissues.

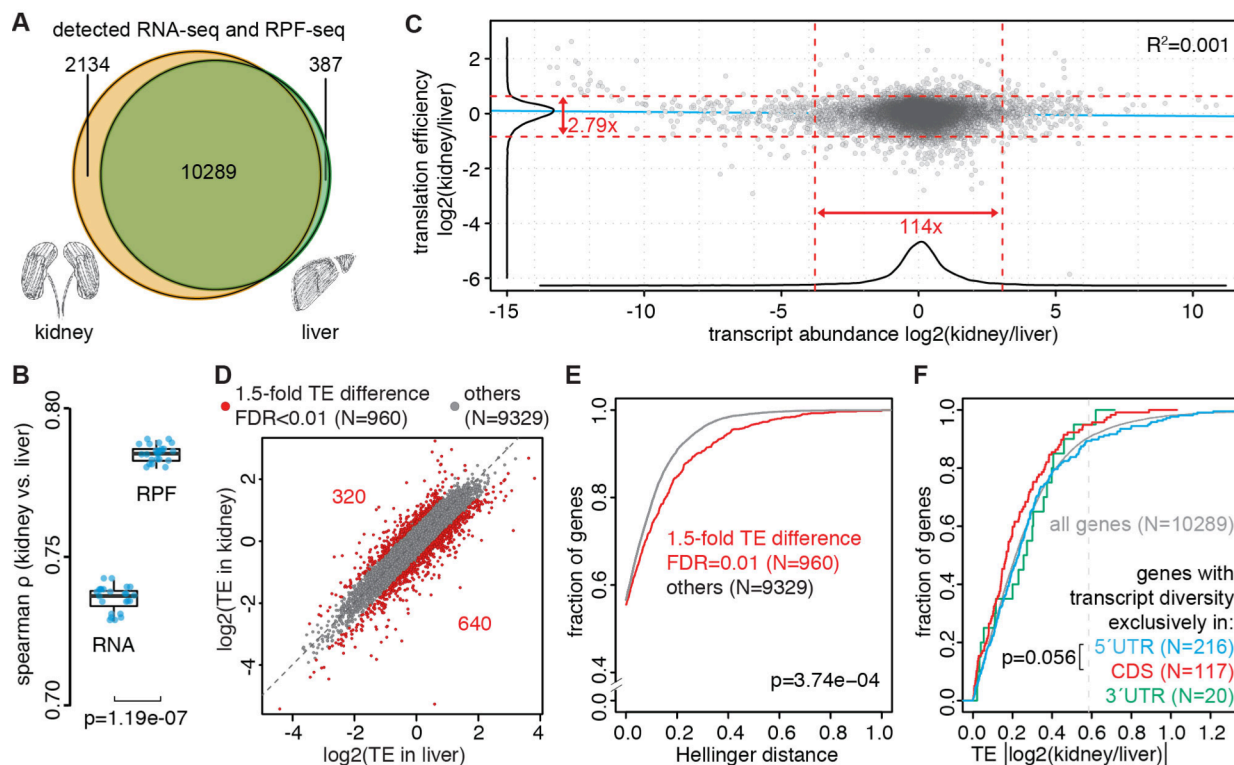

**Figure 2. Contribution of translation efficiency to tissue-specific protein biosynthesis.**

**(A)** Venn diagram showing the overlap in the expressed genome (i.e. detected at both RPF-seq and RNA-seq levels) between kidney (yellow,  $n=12423$  genes) and liver (green,  $n=10676$  genes). **(B)** Inter-organ Spearman correlation for RNA-seq and RPF-seq samples. Each dot represents the correlation coefficient for a timepoint and replicate sample. Note that RPF-seq samples consistently correlated significantly better than RNA-seq samples did ( $p=1.19e-07$ ; Wilcoxon signed rank test). **(C)** Scatterplot of kidney-to-liver ratio of mRNA abundance vs. translation efficiency (TE) for all expressed genes ( $n = 10289$ ), averaged over all timepoints. Corresponding density curves are plotted on the margins. Dashed red lines represent the 2.5 and 97.5 percentiles of each variable, and the corresponding fold-change is indicated. Linear regression line is depicted in blue ( $R^2=0.0009$ ,  $p=0.0009$ ). While 95% of genes spanned a 114-fold range in mRNA abundance differences across organs, the same number of genes changed less than 3-fold in TE, indicating that transcript abundance was the main contributor to divergent gene expression output. **(D)** Relative TE in liver vs. kidney, centered and averaged over all timepoints for all expressed genes ( $n=10289$ ), showed an overall inter-organ correlation (grey,  $n=9329$ ). However, differential TE was detected for ~9% genes (red,  $n=960$ ). Differential TE genes are defined as having FDR-corrected  $p$ -value  $< 0.01$  (Wilcoxon signed rank test on TE) and  $>1.5$  difference in TE across organs. **(E)** Cumulative distribution of Hellinger distances for genes showing differential TE (red,  $n=960$ ), or not (grey,  $n=9329$ ), as detected in (D). Hellinger distance was used as a measure to quantify how divergent relative transcript isoform usage was across organs (see main text and methods section); the analysis shows that divergent TE correlated with larger diversity in transcript isoform expression ( $D=0.0702$ ,  $p=3.74e-04$ , two-sample Kolmogorov-Smirnov [KS] test). **(F)** Cumulative distribution of the absolute kidney-to-liver TE ratio for genes whose transcript diversity originated only from the 5' UTR (blue,  $N=216$ ), only from the CDS (red,  $N=117$ ) or only from the 3' UTR (green,  $N=20$ ). The vertical dotted grey line marks the 1.5-fold difference used to define differential TE (as in (D)). Although the difference between the “5' UTR diversity only” and the “CDS diversity only” distributions did not reach statistical significance ( $D=0.15349$ ,  $p=0.056$ , two-sample KS-test), these results suggested that tissue specificity in TE was partially achieved by expressing transcript isoforms that differ in their 5' UTR.

115

## 116 **Quantifying the contribution of translation efficiency to tissue-specific gene expression levels**

117 Applying identical cut-offs on RPKM (reads per kilobase of transcript per million mapped reads) for both  
118 organs, we identified 10289 genes whose expression was shared and which were detectable at both  
119 levels, RNA and RPF (Fig. 2A). Of note, the number of genes expressed uniquely in one organ was greater  
120 for kidney than for liver (2134 vs. 387 cases of tissue-specific expression), likely owing to the more  
121 heterogeneous cellular composition of this organ.

122 Interestingly, we noted that between organs, footprint abundances correlated consistently better than did  
123 RNA abundances (Spearman  $\rho$  [RPF]: mean 0.784 vs.  $\rho$  [RNA]: mean 0.736;  $p=1.19e-07$ ; Wilcoxon signed  
124 rank test) (Fig. 2B; Supplemental Fig. S2C-D). This observation lends further support to the idea that  
125 differences in mRNA expression across tissues are partially compensated by translation, leading to  
126 convergence at the level of protein biosynthetic output. Of note, this finding is conceptually similar to the  
127 reported higher evolutionary conservation of the proteome vs. the transcriptome that has been described  
128 (e.g. (Schrimpf et al. 2009; Khan et al. 2013)).

129 From the ratio of CDS-mapping RPF-seq to RNA-seq reads we next calculated relative translation  
130 efficiencies (TEs) per transcript and for each organ. We first quantified the degree to which TE differences  
131 contributed to organ-specific gene expression output. These analyses revealed that TEs were overall  
132 rather similar between organs, as 95% of genes fell into a less than 3-fold range for the kidney/liver  
133 relative TE ratio (Fig. 2C). By contrast, this range was greater than 100-fold for the transcript abundance  
134 ratio. Given that already within each organ, mRNA abundances showed a considerably broader spread  
135 than TEs (several hundredfold vs. barely greater than tenfold, respectively; Supplemental Fig. S4A-B; see  
136 also (Ingolia et al. 2011; Janich et al. 2015)), large differences in TEs between organs were not to be  
137 expected. Together with other recent analyses (discussed in (Li and Biggin 2015; Liu et al. 2016)), our  
138 observations make earlier suggestions that TE could be particularly good predictors of protein abundances  
139 seem improbable. They are rather in line with a dominant role for the regulation of mRNA levels (i.e.,  
140 transcription and mRNA decay) in controlling gene output.

141 Despite the overall comparatively narrow dynamic range, TE differences between the organs reached  
142 statistical significance for a large proportion of the transcriptome. Comparison of the 24 kidney and



143 matching 24 liver samples conferred high statistical power and yielded 5013 genes whose transcripts' TEs  
144 were significantly different between tissues (Wilcoxon signed rank test for paired samples; FDR<0.01); we  
145 further implemented a 1.5-fold cut-off on TE ratio in order to select the cases that showed the strongest  
146 regulation, resulting in 960 "TE different" genes (Fig. 2D).

147 We next examined whether any overt transcript characteristic would have predictive value for differential  
148 TE. Remarkably, however, we were unable to identify any single, dominant mRNA feature that would  
149 potentially indicate an underlying mechanism. For example, we had previously observed that in the liver  
150 the presence of a translated upstream open reading frame (uORF) in the 5' UTR had strong predictive  
151 value for low TE on the transcripts' main ORF (Janich et al. 2015). An analogous analysis on the kidney  
152 datasets revealed a comparable relationship between uORF usage and low TE in this organ as well  
153 (Supplemental Fig. 4C). Nevertheless, we were unable to detect a significant correlation between  
154 differential uORF usage and TE differences of transcripts across organs (data not shown; see also below,  
155 Fig. 5F). Similarly, the 960 "TE different" transcripts were not enriched for any predicted miRNA binding  
156 sites, making it unlikely that this class of post-transcriptional regulators is a major player in establishing  
157 tissue-specific TEs (data not shown).

158 The only feature that we were able to identify as significantly associated with differential TE was  
159 transcript isoform diversity between the two organs i.e., the occurrence of tissue-specific mRNA variants  
160 as generated by alternative transcriptional start sites, by alternative splicing, and by alternative 3'  
161 cleavage/polyadenylation sites (Fig. 2E). In short, in this analysis we first used the RNA-seq data to  
162 compile an inventory of the annotated, protein-coding transcript isoforms and their estimated relative  
163 expression levels for each gene and separately for both tissues. We then used the Hellinger distance  
164 (Gonzalez-Porta et al. 2012) as a measure of dissimilarity of isoform expression levels between kidney and  
165 liver. A value of 0 for this metric signifies that a gene has identical distribution of isoform expression levels  
166 between the tissues and a value of 1 the lack of overlap in expressed isoforms. Globally, "TE different"  
167 genes showed significantly higher Hellinger distances than the remainder of the expressed genes  
168 ( $p=3.74e-04$ ; Kolmogorov-Smirnov-test) (Fig. 2E), indicating that TE differences between tissues may in  
169 part have their origin in tissue-specific transcript variants. However, it is important to note that this

170 mechanism can potentially account only for some of the observed TE divergence, as slightly over half of all  
171 expressed genes, including those within the “TE different” set, showed Hellinger distance of 0 (i.e., the  
172 same, single protein-coding transcript isoform was expressed in kidney and liver) (Fig. 2E). Molecularly,  
173 the term “transcript isoform” comprises variations in mRNA structure that can affect 5’ UTR, CDS, 3’ UTR,  
174 or frequently combinations thereof. To evaluate whether any particular such variation would be more  
175 predictive of TE differences than another, we selected the genes for which the expressed variants affected  
176 only one of the features (5’ UTR, CDS, or 3’ UTR), omitting the more common, but potentially complicated  
177 combinatorial cases from our analysis. We found that transcript diversity affecting the 5’ UTR was more  
178 highly associated with differential TE than was CDS diversity (Fig. 2F). Of note, the association of the 5’  
179 UTR with TE is in line with the view that initiation is rate-limiting for translation and that structure and  
180 sequence at and upstream of the translational start determine the efficiency with which scanning  
181 ribosomes commit to a productive engagement. Unfortunately, the low number of transcripts that  
182 showed exclusive 3’ UTR diversity (20 genes) precluded a reasonable interpretation, and although the  
183 generally low number of genes available for all three groups limited the statistical power of our analyses,  
184 it is remarkable that the difference between 5’ UTR and CDS only marginally failed the commonly used  
185 threshold of statistical significance ( $p=0.056$ ; Kolmogorov-Smirnov-test) (Fig. 2F).

186 Finally, we were interested in whether cross-organ differences in TE were associated with functional  
187 classes of transcripts. For the 640 “TE different” genes that showed increased translation rate in liver (Fig.  
188 2D), gene ontology (GO) analyses revealed significant enrichment for categories related to transcription  
189 (Supplemental Table S2). Conceivably, tissue-specific translational control of transcriptional regulators  
190 may have wide-ranging implications for the organs’ transcriptomes. The 320 “TE different” genes that  
191 were translated better in kidney (Fig. 2D) did not show any enrichment for specific functional classes.

## 192 **Translational modulation of phase of oscillation in kidney**

193 We next turned to the analysis of factor time across the datasets. In order to annotate rhythmic events for  
194 kidney we used the same methodology, including a 1.5-fold cut-off on peak-to-trough amplitudes, as  
195 previously for the liver time series (Janich et al. 2015). A list of the detected RNA and RPF rhythms and

196 genome-wide gene expression plots can be found in Supplemental Table S3 and in Supplemental Dataset  
197 S1, respectively. Our analyses yielded 1338 genes whose RNA abundance oscillated and 977 that cycled at  
198 the footprint level, corresponding to 10.8% and 7.9% of expressed genes in kidney (Fig. 3A). The overlap of  
199 542 genes corresponded to 41% and 55% of the “transcript rhythmic” and “footprint rhythmic” cases,  
200 respectively (Fig. 3A). However, it is important to note that this rather modest concordance between the  
201 rhythmic RNA and RPF gene sets certainly underestimates the true extent of rhythmicity shared between  
202 RNA abundance and ribosome footprints, and overestimates the extent of “RNA only” and “translation  
203 only” oscillations. The reasons lie in the propensity of rhythmicity detection algorithms to generate false-  
204 negatives, and the lack of a canonical method to reliably determine true absence of rhythms (a common  
205 problem in the field, see (Luck and Westermark 2016) for discussion). As in our previous study (Janich et  
206 al. 2015) the only sector from the Venn diagram that we analyzed further was that of the 542 common  
207 rhythmic gene, and we implemented more sophisticated methods to identify the true-positive  
208 “translation only” cycling transcripts (see later).

209 Interestingly, the comparison of RNA abundance and footprint rhythmicity parameters across the 542  
210 genes revealed that the timing of the RPF peaks relative to the RNA peaks had a significantly different and  
211 broader distribution than the analogous set from liver ( $p < 1.0e-04$ ; permutation test) (Fig. 3B). This finding  
212 suggested that the phase of protein biosynthesis rhythms undergoes stronger translational modulation in  
213 kidney than it does in liver, where RPF peaks are more tightly gated by RNA abundance peaks. Moreover,  
214 it was striking that the kidney data showed a tendency for maximal translation to *precede* maximal mRNA  
215 abundance (Fig. 3C). Although the mean RPF peak time advance (-0.123 hours) did not reach statistical  
216 significance ( $p = 0.16$ , Wilcoxon rank sum test), the large number of transcripts (282) for which the rhythm  
217 of translation was phase-advanced to its RNA accumulation was intriguing.

218 A shortcoming of the above phase analysis is that different rhythmic gene sets were compared between  
219 the two organs. The alleged tissue differences in the RPF-RNA phase relationships could therefore have  
220 simply arisen from transcript-specific rather than tissue-specific differences in the timing of translation.  
221 We therefore determined the common rhythmic transcript set by overlapping kidney and liver with regard  
222 to rhythmic events (Fig. 3D). A group of 178 genes (that included most core clock components;

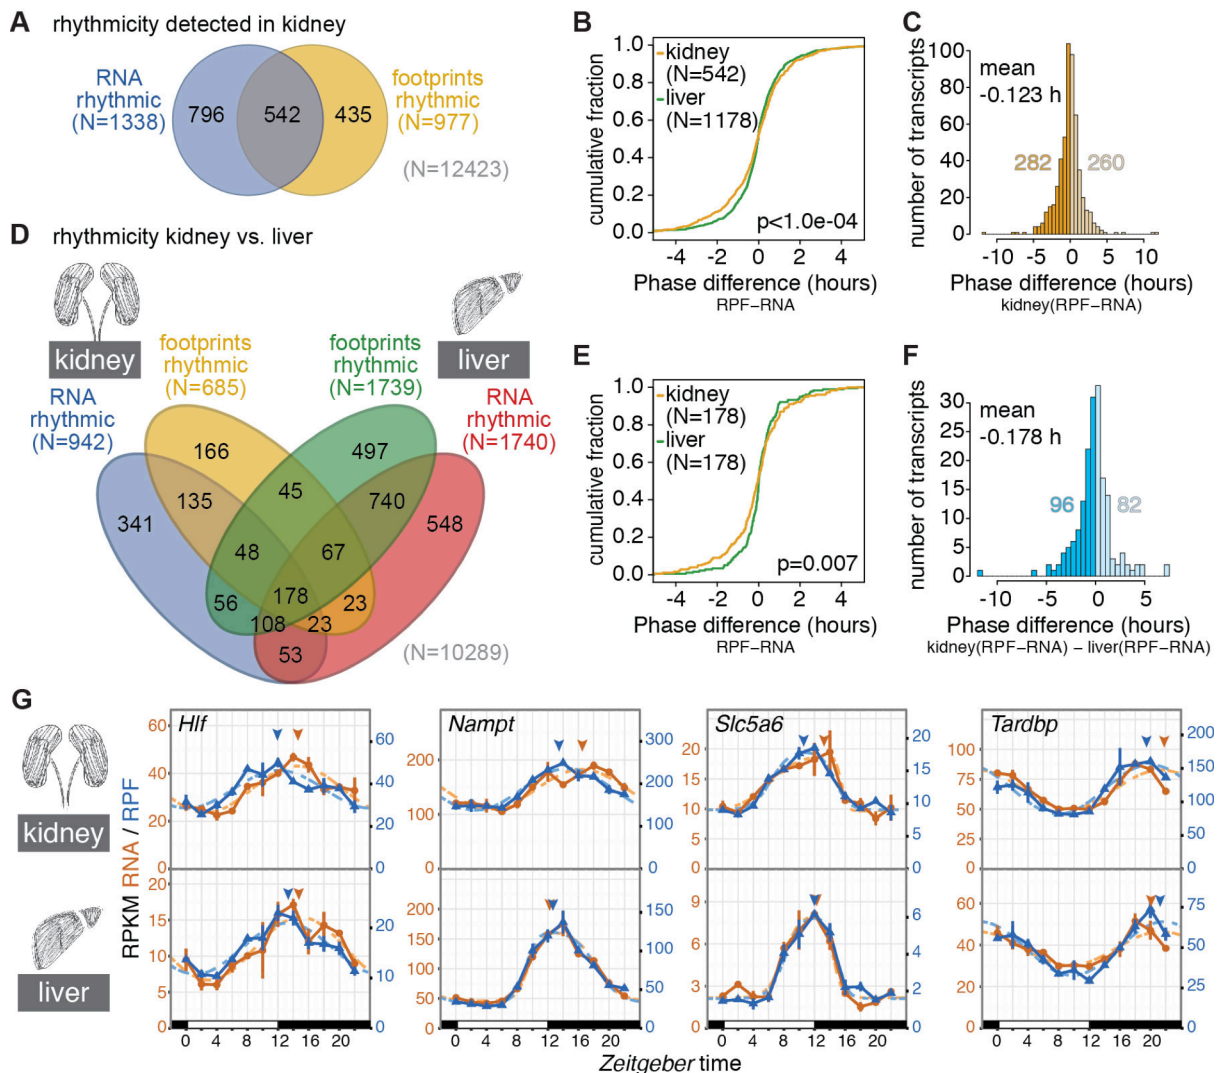

**Figure 3. Rhythmicity analysis across organs and oscillation phase regulation.**

(A) Venn diagram of the rhythmicity analysis in kidney. Of the 12423 genes detected, 1338 showed 24-hour oscillations of >1.5-fold amplitude in mRNA abundance (RNA-seq, 10.7%), 977 in footprints abundance (RPF-seq, 7.9%), and 542 (4.3%) were detected as rhythmic at both levels. 10650 (85.7%) genes were detected as non-rhythmic in our analysis. (B) Cumulative distribution of phase differences (RPF peak - RNA peak, in hours) for genes rhythmic at both RNA-seq and RPF-seq in liver (green, N=1178) and kidney (yellow, N=542). The two distributions were significantly different ( $p < 1e-04$ , permutation test), and reflected that maximal footprint abundance frequently preceded mRNA abundance peaks in kidney (note that the two distributions differed mostly in their negative tail). (C) Histogram of phase differences (RPF-RNA, in hours) for genes rhythmic at both levels in kidney (N=542). Although the distribution mean was not significantly different from 0, more genes had their footprint abundance peaks advanced (N=282) than delayed (N=260) with respect to their mRNA abundance peak. (D) 4-way Venn diagram of rhythmicity sets for genes expressed in both tissues (n=10289). 364 and 238 genes were detected as rhythmic in both organs at the RNA-seq and RPF-seq levels, respectively, and 178 genes were detected as rhythmic throughout (i.e. at RNA-seq and RPF-seq, in kidney and in liver). (E) Cumulative phase difference distribution in liver (green) and kidney (yellow) for the 178 genes rhythmic throughout. As in (B), the distributions were significantly different ( $p=0.007$ , permutation test), and reinstated that even when comparing the same set of genes, footprint peaks frequently preceded mRNA abundance maxima in kidney. (F) Histogram of the differential (kidney - liver) phase delay (RPF - RNA) for the 178 genes rhythmic throughout. (G) Daily profiles of RPF-seq RPKM (blue) and RNA-seq RPKM (orange) for four representative genes in which footprint abundance peaks preceded by several hours maximal mRNA abundance in kidney (top) but not, or less so, in liver (bottom). Arrowheads indicate the peak in footprint and mRNA abundance in their respective colors as estimated by the rhythmic fits.

224 Supplemental Fig. S5A; Supplemental Table S4; Supplemental Dataset S2), showed rhythmicity  
225 throughout, i.e. in both organs at RNA and RPF level. For this transcript set, the distribution of RPF-RNA  
226 intervals was significantly broader in kidney than in liver (Fig. 3E;  $p=0.007$ , permutation test) with an RPF  
227 peak phase advance in kidney (mean  $-0.143$  h) and a phase delay in liver (mean  $0.036$  h) (Supplemental  
228 Fig. S5B-C). We next calculated the gene-wise RPF-RNA phase difference in kidney relative to that in liver.  
229 More genes showed their RPF peaks advanced (96) than delayed (82) in kidney vs. liver, with a mean  
230 phase advance that amounted to  $-0.178$  hours (Fig. 3F). Although the phase advance globally did not  
231 reach statistical significance ( $p=0.152$ , Wilcoxon rank sum test), visual inspection of the RNA and RPF  
232 profiles identified numerous compelling cases of transcripts where specifically in kidney translation  
233 peaked up to several hours ahead of maximal RNA abundance, as shown by the examples *Hlf* (Hepatic  
234 leukemia factor, a circadian PAR-domain basic leucine zipper transcription factor), *Nampt* (Nicotinamide  
235 phosphoribosyltransferase, an enzyme involved in NAD biosynthesis), *Slc5a6* (solute carrier family 5  
236 member 6, a sodium-dependent transporter for biotin and other vitamins) and *Tardbp* (TAR DNA binding  
237 protein) (Fig. 3G).  
238 Translation that is phase-advanced to mRNA abundance is counterintuitive at first sight. Conceivably,  
239 however, it may occur when the translation rate is not constant over the lifetime of the mRNA but  
240 decreases, e.g. as a result of its gradual deadenylation liver (Kojima et al. 2012). In keeping with this  
241 hypothesis, we have observed that most subunits of the major cytoplasmic deadenylase complex, CCR4-  
242 NOT, are significantly more highly expressed in kidney than in liver (Supplemental Fig. S6A-C). Higher  
243 deadenylase activity in kidney could provide an attractive molecular explanation for the observed tissue-  
244 specific differences in RPF-RNA phasing, and in particular for phase-advanced RPF rhythms.

#### 245 **High tissue divergence in translationally driven rhythms**

246 The aforementioned predisposition of rhythmicity detection methods to yield false-negatives, which was  
247 confirmed in our liver study (Janich et al. 2015) and evident in the kidney datasets as well (Supplemental  
248 Fig. S7), reinforced the notion that Venn diagrams that simply overlap rhythmic gene sets need to be  
249 interpreted with caution. Specifically, it led to an overestimation of the number of “RNA only” and of

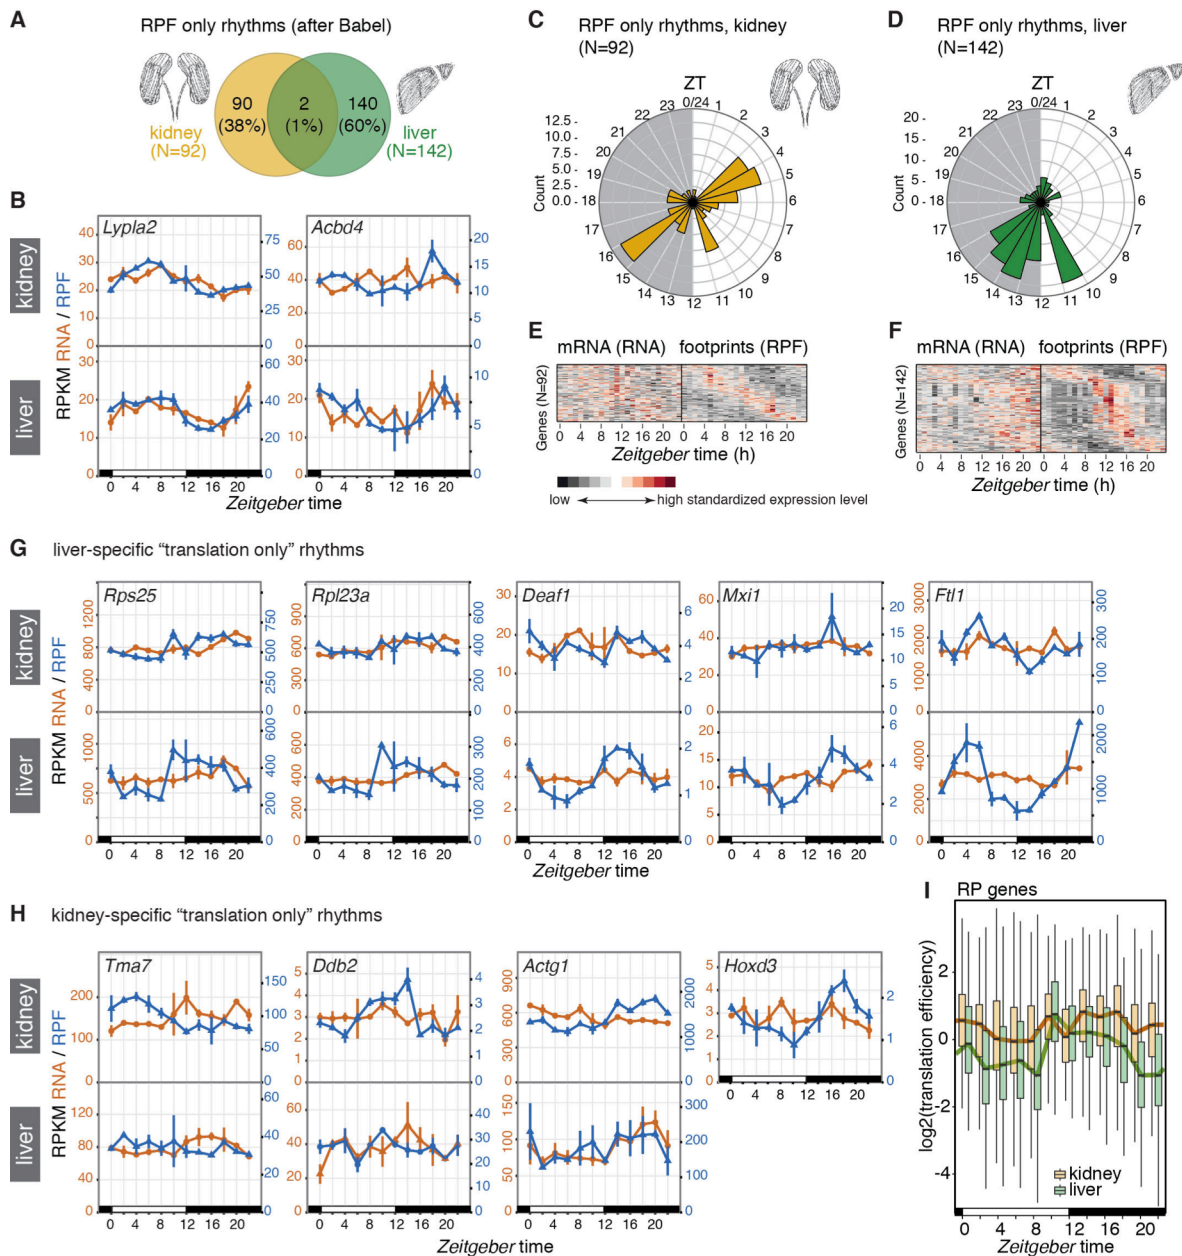

**Figure 4. Tissue-specificity of translational rhythms.**

(A) Venn diagram of rhythmic RPF-seq sets in liver (green, N=142) and kidney (yellow, N=92) after the *Babel* analysis showed the tissue-specificity of translational control. (B) Daily profiles of RPF-seq RPKM (blue) and RNA-seq RPKM (orange) for the two genes detected as translationally regulated in both tissues in (A). (C) Circular phase histogram for the 92 genes showing footprint rhythmicity in kidney. Maxima were clustered around ZT04 and ZT16, but not at the light-dark transition. (D) Circular phase histogram for the 142 genes showing footprint rhythmicity in liver. As reported before (Janich et al. 2015), translational rhythmicity in liver is enriched for maxima at the day-to-night transition. (E) Heatmap of RNA-seq (left) and RPF-seq (right) expression for the 92 genes translationally regulated in kidney. Genes are sorted by footprint phase and expression levels are standardized by row (gene). The heatmap reflects presence and absence of rhythmicity at the footprint and mRNA abundance levels, respectively. (F) As in (E) for the 142 rhythmically translated transcripts from liver. (G) Daily profiles of RPF-seq RPKM (blue) and RNA-seq RPKM (orange) for representative examples of genes with translational rhythms only in liver (lower panels) and not in kidney (upper panels). (H) Daily profiles of RPF-seq RPKM (blue) and RNA-seq RPKM (orange) for representative examples of genes with translational rhythms only in kidney (upper panels) but not in liver (lower panels). *Hoxd3* was not expressed in liver. (I) Translation efficiency (TE) along the day for ribosomal protein (RP) genes expressed in liver (green, n=86) and in kidney (yellow, n=89). For each timepoint (ZT) boxplots represent the interquartile range and whiskers extend to the minimum and maximum TE within 1.5 times the interquartile range. Lines connect the median of each boxplot to ease visualization. Notice the global TE upregulation at ZT10 in liver, whereas TEs in kidney remain high over the day.

251 “footprints only” rhythmic genes (Supplemental Fig. S7B, D). In order to identify the rhythmically  
252 translated, constantly abundant transcripts in kidney with higher confidence, we implemented the  
253 analytical framework *Babel* (Olshen et al. 2013) that we had previously used for the liver data as well  
254 (Janich et al. 2015), to preselect the transcripts whose translation efficiency changed significantly over the  
255 day (and/or whose TEs deviated significantly from the global transcript population). Rhythmicity analyses  
256 that were then performed on this gene subset yielded 92 cases with the sought after temporal profiles of  
257 rhythmic translation on non-rhythmic mRNAs (Fig. 4A). Comparison with the 142 genes of the analogous  
258 set from liver revealed that translationally driven oscillations in protein biosynthesis showed near-perfect  
259 tissue specificity. Only two genes, *Abcd4* (ATP binding cassette subfamily D member 4) and *Lypla2*  
260 (lysophospholipase 2), were shared between the organs and, moreover, visual inspection indicated that  
261 they were among the least compelling cases of “translation only rhythms” that our method had identified  
262 (Fig. 4B).

263 Marked tissue-specificity was further apparent for the daily timing of rhythmic translational events. The  
264 phase histograms thus showed striking differences in the peak time distribution between the organs (Fig.  
265 4C-D; difference in distributions:  $p=1.66e-04$ ;  $W = 17.403$ ,  $df = 2$ ; Watson-Wheeler test for homogeneity of  
266 angles). Of note, the enrichment for translational maxima at the light-dark transition (*Zeitgeber* time,  
267 ZT10-16; ZT00 corresponds to lights-on and ZT12 to lights-off) that dominated the distribution in liver (Fig.  
268 4D, F) was virtually absent from kidney (Fig. 4C, E). Instead, kidney showed enrichment for transcripts with  
269 maximal translation occurring around ZT4 and ZT16. Visual inspection of individual examples confirmed  
270 liver- and kidney-specificity of RPF rhythms. The cases of robust translational oscillations that we (Janich  
271 et al. 2015) and others (Jouffe et al. 2013; Atger et al. 2015) had previously identified in liver were thus  
272 absent or severely blunted in kidney; of note, this included mRNAs encoding ribosomal proteins that make  
273 up the bulk of genes showing translational upsurge at the light-dark transition (e.g. *Rps25*, *Rpl23a*), as well  
274 as transcripts encoding the transcription factors *Deaf1* (deformed epidermal autoregulatory factor 1) and  
275 *Mxi1* (MAX interactor 1), and mRNAs containing iron-responsive elements in their 5' UTRs (e.g. Ferritin  
276 light chain 1, *Ftl1*) (Fig. 4G), all of which we had previously reported as translationally rhythmic in liver  
277 (Janich et al. 2015). Rhythmic translation exclusive to kidney was not significantly enriched for particular

278 pathways (data not shown), and the temporal profiles were overall of lower amplitude than those seen  
279 for liver; *Tma7* (Translational machinery associated 7 homolog), *Ddb2* (Damage-specific DNA binding  
280 protein 2), *Actg1* (Actin, gamma, cytoplasmic 1) and *Hoxd3* (Homeobox D3; not expressed in liver) were  
281 among the most distinct examples (Fig. 4H). We concluded that temporal changes in TE were relatively  
282 rare in kidney and overall strikingly tissue-specific, possibly indicating differential sensitivity of the organs  
283 to the systemic signals or other mechanisms that drive such protein biosynthesis rhythms. Specifically for  
284 the most prominent group of genes subject to daily TE regulation in liver i.e., transcripts encoding  
285 ribosomal proteins (RPs) and other components of the translation machinery, it has been suggested that  
286 feeding-dependent mTOR-signaling underlies their translational upsurge at the light-dark transition via a  
287 mechanism that involves the 5'-terminal oligopyrimidine (5'-TOP) motifs that these transcripts carry  
288 (Jouffe et al. 2013; Atger et al. 2015), and our findings thus suggest that kidney is less sensitive to the  
289 responsible systemic cues. Moreover, the TE comparison between both tissues revealed that in kidney RPs  
290 were translated at a higher level throughout the day (Fig. 4I), indicating that the lack in rhythmicity in this  
291 organ resulted from an absence of translational repression during the light phase rather than an absence  
292 of activation in the dark phase.

### 293 **Tissue-specificity in core clock protein biosynthesis**

294 Observations such as the signature of translational compensation (Fig. 2B) or the phase modulation of  
295 CCGs (Fig. 3E), led us to conclude that the initial transcriptomal gene expression outputs underwent  
296 widespread refinement at the translational level. In particular within the core clock circuitry, such  
297 regulation could have important consequences. Conceivably, the rate and timing in the biosynthesis of  
298 individual clock proteins could underlie known cell type differences in core clock parameters (such as free-  
299 running period *ex vivo*/phase of oscillation *in vivo* (Yoo et al. 2004)), in clock output gene repertoires  
300 (Zhang et al. 2014), in oscillator strength and robustness (e.g. (Yagita et al. 2010; Lee et al. 2011)), or in  
301 clock gene loss-of-function phenotypes (e.g. (Landgraf et al. 2016)). We therefore aimed to gain  
302 quantitative insight into core clock protein biosynthesis in the two organs and at all three levels, RNA  
303 abundance, protein biosynthetic output (footprints), and translation efficiency. We first investigated RNA-



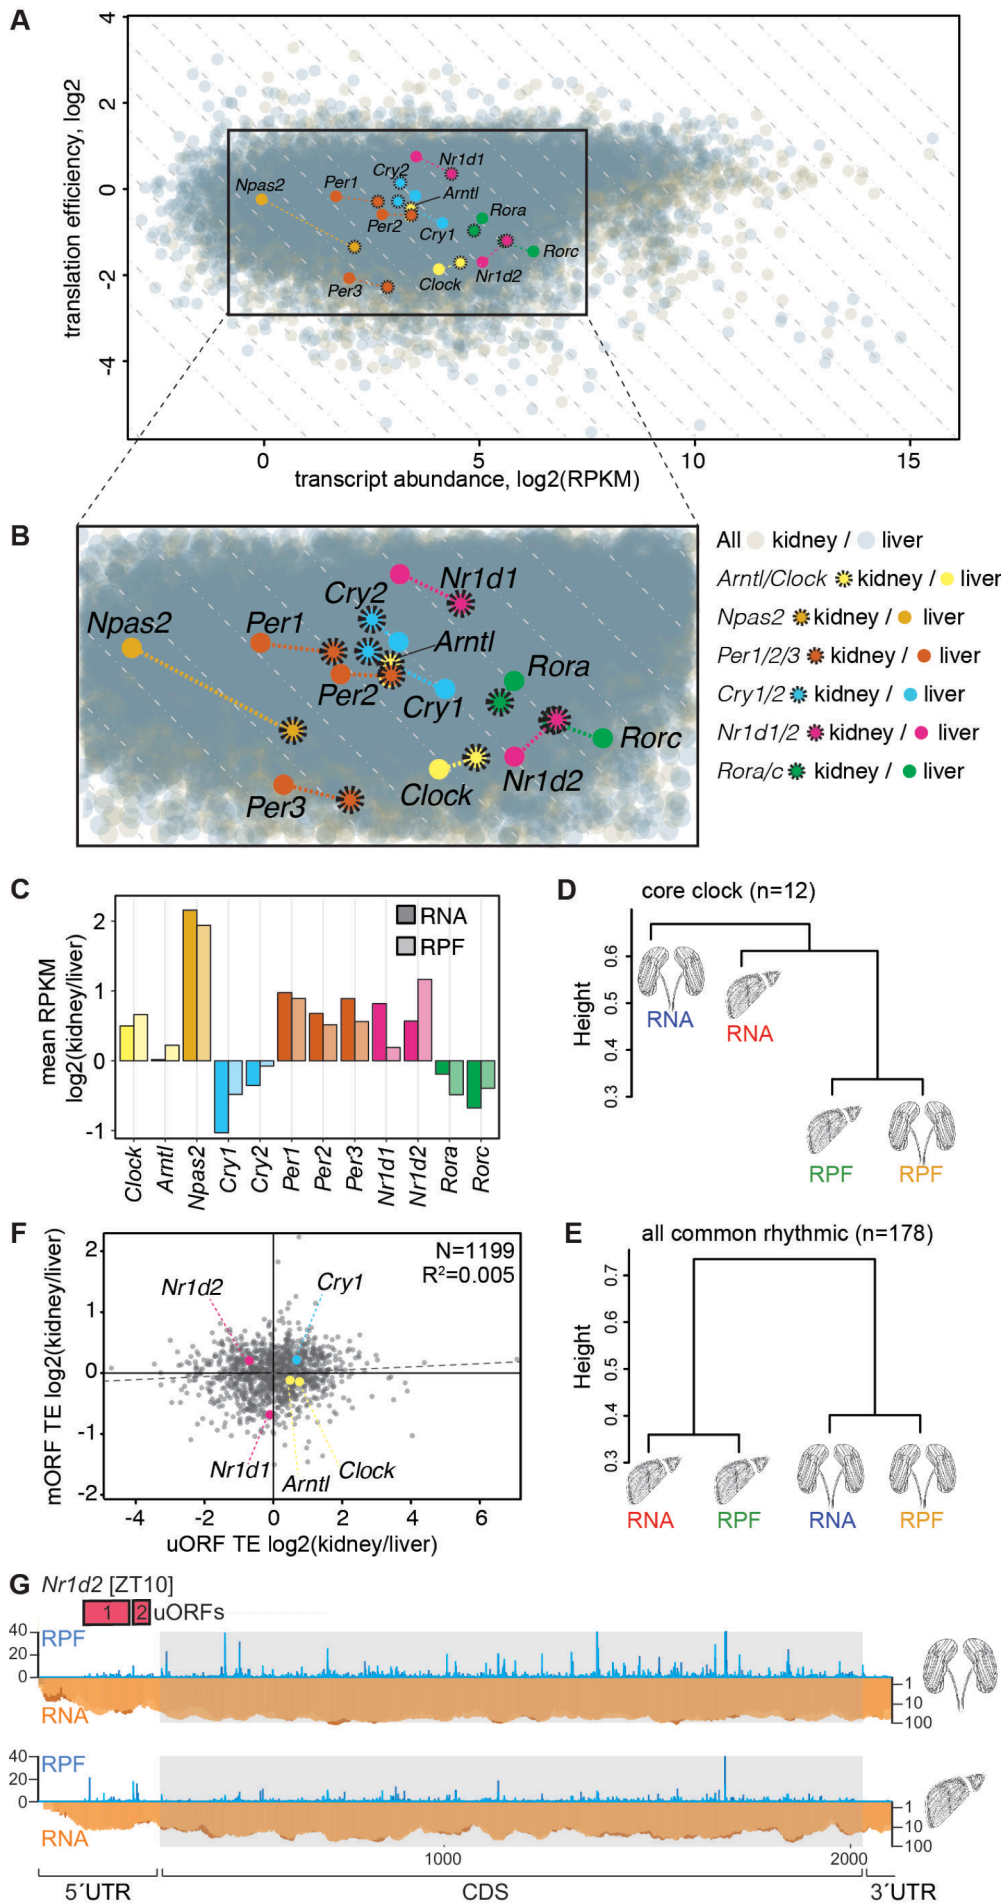

**Figure 5. Translational buffering within the core clock circuitry.**

**(A)** Scatterplot of transcript abundance vs. translation efficiency for liver (grey) and kidney (sepia), where core clock components are highlighted. Diagonal grey dashed lines indicate same amounts of absolute protein synthesis, where RNA abundance differences are compensated by TE differences. Colored dashed lines join the relative locations of each core clock genes between organs (kidney dots with dashed circles). Note that several core clock components (e.g. *Per* genes, *Cry1*, *Nr1d1*, *Rorc*, *Npas2*) are located along the descending diagonals, suggesting that translational buffering occurs for clock components and counteracts mRNA expression variations. **(B)** Magnification of the indicated area of (A). **(C)** Bar graph of the average RPKM ratio between kidney and liver for the main circadian core clock genes, at the level of mRNA abundance (dark shades) and ribosome footprints (RPF) (light shades) showed that translational buffering led to a higher similarity at the level of protein biosynthesis (RPF) for several core clock genes. **(D)** Hierarchical clustering of the organs' transcriptomes and translomes based on the similarities of the core clock genes expression patterns (n=12 genes shown in A-C). The height of the branches represents weighted average distances over the considered genes (see Methods). **(E)** Hierarchical clustering of the organs' transcriptomes and translomes based on the similarities in expression patterns of genes detected as rhythmic throughout (i.e. at both RNA and RPF levels in both organs, N=178, see Fig. 3D). The height of the branches represents weighted average distances over the considered genes (see Methods). When compared to the clustering based on core clock gene expression patterns in (D) – for which the higher conservation of protein synthesis levels than mRNA levels was evident – this rhythmic gene set showed an organ-based clustering. **(F)** Scatterplot of upstream ORF (uORF) translation efficiency (TE) vs. main ORF (mORF) TE across organs for genes containing AUG-initiated translated uORFs in both organs (n=1199). uORF-containing core clock genes are highlighted. This analysis showed that differential uORF usage could not globally explain differences in mORF TE across organs (note the lack of negative correlation between the two variables,  $R^2 = 0.005$ ,  $p=0.008$ ). As an exception, the lower uORF TE of *Nr1d2* in kidney might explain its relatively higher mORF TE. **(G)** Raw read distribution for RPF (in blue) and RNA (in orange) along the 5' UTR and CDS of *Nr1d2* in kidney (top) and liver (bottom) for the timepoint of maximal CDS translation. Red boxes indicate AUG-initiated uORFs as predicted in our analyses.

305 seq RPKMs and TEs in a non-time-resolved fashion (averages over timepoints) in order to compare the  
306 cumulative daily production across all clock proteins. We noted that most core clock components showed  
307 a considerable degree of organ-specificity in their expression that was readily appreciable in the TE vs.  
308 RNA abundance representation with both organs plotted in a single graph (Fig. 5A-B). In this  
309 representation, identical amounts of biosynthesized protein (i.e., identical RPF RPKMs) locate along the  
310 descending diagonals on which differences in transcript abundance and TE cancel each other out.  
311 Interestingly, the majority of core clock genes (*Npas2*, *Cry1*, *Cry2*, *Per1*, *Per2*, *Per3*, *Nr1d1*, *Rorc*) showed,  
312 at least to some degree a diagonal vectorial component (Fig. 5B), which indicated compensatory TE  
313 changes that partially counteracted RNA abundance differences between the organs. For *Clock*, *Arntl*,  
314 *Nr1d2* and *Rora*, changes in TE exacerbated transcript abundance differences (Fig. 5B-C).  
315 The inspection of quantitative relationships between clock components revealed that the main positive  
316 (*Clock*, *Arntl*) and negative (*Per1/2*, *Cry1/2*) limb members were all produced in roughly comparable  
317 amounts in kidney (i.e., they aligned along a relatively narrow diagonal zone in Fig. 5B), whereas  
318 interconnecting limb protein biosynthesis (*Nr1d1/2*, *Rora/c*) was 2-4-fold higher (i.e., they were shifted to  
319 the right in Fig. 5B). Overall, we had previously observed a similar pattern in the liver data (Janich et al.

320 2015). Despite the overall similarity between kidney and liver, however, we also noticed two striking  
321 manifestations of organ specificity in the amounts and relative ratios of clock protein biosynthesis. First,  
322 the interconnecting limb appeared to be subject to “reprogramming”, with an increased biosynthesis of  
323 repressive (*Nr1d1/2*) and a decreased production of activating (*Rora/c*) elements in the kidney (Fig. 5C). Of  
324 note, beyond functioning in the rhythm-generating clock circuitry, interconnecting limb transcription  
325 factors also control an output branch of the oscillator. Consistent with the gene expression differences  
326 that we observed (i.e., more activators and less repressors in liver), major loss-of-function phenotypes of  
327 interconnecting limb components that have been reported are indeed associated with hepatic pathways,  
328 for example with lipid, cholesterol and bile acid metabolism (e.g. (Raspe et al. 2002; Le Martelot et al.  
329 2009)). We deem it an attractive hypothesis that by controlling the relative levels of NR1D1/2 vs. RORs,  
330 clock output gene repertoires would be tailored in a tissue-specific fashion. Translational mechanisms are  
331 likely involved in the regulation, in particular to enhance NR1D2 production in kidney. Second, we  
332 observed that within the negative limb, the ratio between PER and CRY biosynthesis was shifted towards  
333 increased PERs in kidney (Fig. 5C). PERs (and in particular PER2) are considered stoichiometrically rate-  
334 limiting components of the inhibitory complex, and increased PER2 dose engenders long period (Gu et al.  
335 2012; D'Alessandro et al. 2015). Consistent with our finding of increased PER production, the free-running  
336 kidney clock shows almost 1.5 hour longer period than that of the liver (Yoo et al. 2004). Conceivably, the  
337 modulation of the relative levels of core clock protein production could engender different stoichiometry  
338 of the circuitry components and lead to distinct oscillatory parameters of clocks across tissues. Of note,  
339 the increase in PER and decrease in CRY biosynthesis in kidney is already established at the transcriptomal  
340 level, with TE differences rather leading to partial compensation (Fig. 5B-C).

341 We next extended the core clock analysis to the time-resolved data. In the expression plots (Supplemental  
342 Fig. S8) we calculated for each gene individually the Euclidean distances between the four rhythmic traces  
343 (i.e., RNA, RPF in kidney, liver), which served as a measure of similarity between the temporal profiles.  
344 Hierarchical clustering of the similarities for the ensemble of the 12 core clock genes showed that RPF  
345 rhythms of the two organs grouped together (Fig. 5D), indicating higher similarity of clock protein  
346 biosynthesis rhythms between organs than of RNA and RPF rhythms within organs. As a control set, we

347 analyzed the 178 common rhythmic genes identified in Fig. 3D, which revealed within-organ clustering  
348 (Fig. 5E). These findings underscored that translational compensation was operative within the core clock,  
349 leading to more similar rhythms in clock protein biosynthesis than would have been predicted from the  
350 rhythmic RNA abundance profiles.

351 In our previous liver RPF-seq study we had identified uORF translation as a mechanism that is able to  
352 regulate the gene expression output for clock components, and we had annotated AUG-initiated uORFs in  
353 *Nr1d1*, *Nr1d2*, *Cry1*, *Clock* and *Arntl* (Janich et al. 2015). We therefore wished to evaluate whether  
354 differential uORF usage could potentially underlie any of the observed cross-organ TE differences for the  
355 core clock components. To this end, we calculated the translation efficiency specifically on uORFs (from  
356 the ratio of uORF-mapping RPF to RNA reads; see Methods) for all uORF-containing genes in the two  
357 organs, and then correlated uORF TE ratio (kidney/liver) with main ORF TE ratio (kidney/liver) (Fig. 5F).  
358 Importantly, given that uORF translation has been associated with decreased initiation at the main ORF  
359 ((Wethmar 2014; Janich et al. 2015) and Supplemental Fig. S4C), we would have expected uORF and main  
360 ORF TE ratios to negatively correlate if differential uORF usage were one of the main mechanisms to  
361 establish organ-specific TEs. This was, however, globally not the case, and we rather observed weak  
362 positive correlation (Spearman  $\rho=0.095$ ). Among individual core clock genes, *Nr1d2* represented the  
363 clearest case for negative correlation, showing lower uORF TE and higher main ORF TE in kidney (Fig. 5F).  
364 Moreover, this negative correlation of uORF- and CDS-mapping footprints in the two organs could be  
365 confirmed by visual inspection of raw RPF reads mapping to the *Nr1d2* transcript (Fig. 5G). For *Nr1d2*,  
366 differential uORF usage could thus represent a plausible mechanism that contributes to organ-specific  
367 protein production, keeping its biosynthesis low in liver and high in kidney.

## 368 **Discussion**

369 Along the way from transcription to protein degradation, gene expression can be regulated at numerous  
370 levels. Certain steps and intermediates have been particularly well explored, including by genome-wide  
371 and quantitative approaches. This has led overall to the view that gene expression differences are typically  
372 generated transcriptionally and can be conveniently studied at the transcriptomal level. However, the

373 functionally relevant output of most gene expression is the protein rather than the transcript.  
374 Quantitative, genome-wide analyses of protein biosynthesis are thus of high interest to complement the  
375 wealth of available transcriptome data. Such studies are still scarce because it is only with the recent  
376 development of the ribosome profiling technique that a dedicated analysis of translational events in a  
377 high-throughput fashion has become possible (Ingolia 2014). Here, we report on a combined analysis of  
378 two paradigms of differential gene expression, namely its tissue dependence and its time of day-  
379 dependence, to evaluate the contribution of translation to the regulation of gene expression output. We  
380 have addressed several, rather fundamental, but still unanswered questions that are of interest to both  
381 chronobiology and the gene expression field at large: How does the dynamic range of translation  
382 efficiency compare to that of transcript abundance across two distinct organs? Is translation efficiency a  
383 default transcript property and comparable across two tissues, or do TEs become reinterpreted in  
384 different cellular environments? Does cross-tissue variability of TEs come with a direction i.e., is there a  
385 global tendency to either reinforce or to buffer transcriptomal differences? What is the extent and what  
386 are the properties of daily rhythms in translation efficiency, in an organ and between organs? Could  
387 differential TE underlie any of the known cross-tissue differences in core clock parameters?  
388 To our knowledge, only one previous study has reported on RPF-seq datasets from two complementary  
389 mammalian tissues (Schafer et al. 2015). The authors recorded datasets from rat liver and heart but, of  
390 note, they also included animals with different genetic backgrounds as covariates in the experimental  
391 design. The study thus mainly focused on exploring strain differences and how genetic variation  
392 influenced translational levels, while tissue differences were not investigated in great detail. Our choice of  
393 liver and kidney (with more than 10'000 commonly expressed transcripts) from the same animals, and the  
394 high resolution of the time series (24 RPF-seq datasets per organ), provided high statistical power to our  
395 analyses.  
396 Over the last years there has been some dispute regarding the contribution that differences in TE make to  
397 gene expression output (discussed in (Li and Biggin 2015; Liu et al. 2016)) – including suggestions that TE  
398 may actually represent the best predictor of protein abundances (Schwanhausser et al. 2011). Our data  
399 contribute to clarifying some of the disagreement and show that – across genes in a tissue and for

400 individual genes between tissues – the dynamic range of transcript abundances is about 30-50-fold  
401 broader than that of translation efficiencies. Gene expression differences are thus mainly set up by  
402 differences in transcription (and, possibly, RNA stability), whereas differences in translation rate have  
403 more of a modulatory role. It is noteworthy that this modulation is globally characterized by directionality  
404 – overall, TE differences thus help to buffer against mRNA abundance differences. Examples for such  
405 translational buffering of divergent gene expression (a phenomenon that was also covered in a recent  
406 review (Liu et al. 2016)) have been reported across yeast species (McManus et al. 2014) and across  
407 genetically different strains of rats (Schafer et al. 2015), and our study now extends this observation  
408 across organs. Conceptually, all these cases of buffering may reflect the fact that selective pressure on  
409 precise gene expression levels likely acts on protein abundances and that more tolerance may exist  
410 towards divergence in RNA levels. It will be exciting to further study the underpinnings of translational  
411 compensation, across tissues and across species.

412 At first site, it may appear unsatisfactory that our analyses did not identify specific, dominant transcript  
413 features and mechanisms that would explain TE differences between organs. Transcript isoform diversity  
414 (in particular at the 5' UTR) may play a role, but for more than half of the transcripts with differential TE,  
415 the same, single protein-coding isoform was expressed in both tissues under investigation. Tissue  
416 differences in the translation machinery and its regulators – including signaling pathways, the activity of  
417 trans-acting factors such as RNA binding proteins (RBPs), translation factors, and even ribosomal  
418 composition or tRNA repertoires – are likely involved. They may act in a combinatorial fashion and we  
419 expect that a complex translational regulatory universe thus awaits discovery. While ribosome profiling  
420 now allows us to record the consequences of such regulation, understanding all its causes represents an  
421 exciting challenge for the future.

422 Our study has allowed novel insights into rhythmic gene expression. The extent to which rhythmicity is  
423 generated by the temporal regulation of translation efficiency has been the subject of speculation ever  
424 since the first report that many rhythmic proteins in liver are encoded by non-rhythmic mRNAs (Reddy et  
425 al. 2006). Our new kidney datasets complement recent time-resolved ribosome profiling studies from liver  
426 (Atger et al. 2015; Janich et al. 2015) and from a circadian cell line, U2OS cells (Jang et al. 2015). Our

427 comparisons reveal that the number of transcripts subject to translational rhythms is slightly lower in  
428 kidney, but overall in a similar order of magnitude as in liver, affecting around 1% of the transcriptome.  
429 We were surprised to see that translational rhythms are essentially tissue-specific in terms of the identity  
430 of rhythmic translation events and in their phase distribution. A possible explanation is that these rhythms  
431 are not driven by local clocks, but by rhythmic systemic cues to which different tissues are not equally  
432 responsive. The effects of feeding and mTOR signaling, for example, may be more pronounced in liver  
433 than in kidney due to the dedicated role that this organ has in energy homeostasis and fasting responses.  
434 Nevertheless, the lack of rhythmicity of components of the translational machinery (ribosomal proteins) in  
435 kidney came as a surprise in the light of previous suggestions of conservation across tissues (Jouffe et al.  
436 2013). In addition to the generation of rhythms by translation (which affected only a relatively small  
437 population of transcripts), our analyses have pointed to a rhythmicity-modulating role affecting the timing  
438 of protein biosynthesis oscillations relative to phase of mRNA abundance rhythms. Consistent with work  
439 by the Green lab that showed interactions between polyadenylation status of mRNAs and rhythmic  
440 protein expression in the liver (Kojima et al. 2012), it is tempting to speculate that such mechanisms are  
441 also operative across organs, with tissue-specific deadenylation kinetics tuning the timing of rhythmic  
442 protein biosynthesis.

443 Historically, the core clock mechanism has been referred to as a “transcript-translation feedback loop”  
444 (TTFL; see e.g. (Dunlap 1996) for an early mention of this term). The actual feedback, however, occurs at  
445 the transcriptional level, and a possible mechanistic role of translational regulation has not been much  
446 investigated. Our cross-organ comparison of core clock protein biosynthesis suggests that translational  
447 control – including through the activity of uORFs (Jang et al. 2015; Janich et al. 2015) – is of regulatory  
448 interest and represents a way by which the identical set of core clock genes could form circuitries with  
449 different stoichiometry of its main components. As a result, both clock parameters and output gene  
450 repertoires may be organ-specifically tuned.

## 451 **Methods**

### 452 **Animals**

453 12-week old male mice (C57BL/6J; Janvier Labs) were entrained for two weeks to light:dark 12:12 cycles  
454 with ad libitum access to food and water and were anesthetized (isoflurane) and sacrificed every two  
455 hours (ZT0 - ZT22, with ZT0 corresponding to “lights-on”) for two daily cycles. Livers and kidneys were  
456 removed and processed either directly or flash-frozen in liquid N<sub>2</sub>. All experimental procedures were  
457 approved by the Veterinary Office of the Canton Vaud (authorization VD2376).

### 458 **Ribosome profiling**

459 Generation of the ribosome profiling libraries (RPF-seq and RNA-seq) was described in our previous study  
460 (Janich et al. 2015). Kidney libraries were prepared in the same manner, with one modification. After RNA  
461 digestion and recovery of ribosome-protected fragments, 5µg of RNA were treated with Ribo-Zero  
462 magnetic kit (Epicentre) according to the manufacturer’s protocol. Ribosomal RNA-depleted samples were  
463 then separated in a 15% PAGE gel. Gel was cut to obtain 26-35 nucleotides long fragments and library  
464 preparation was continued as done for liver samples and according to the ARTseq ribosome profiling kit  
465 instructions (Epicentre). These two steps (Ribo-Zero treatment and PAGE separation) had been inverted  
466 during the preparation of our liver samples in order to obtain sufficiently concentrated libraries for  
467 sequencing. However, applying this strategy for kidney samples recovered (and sequenced) the rRNA  
468 fragments of the Ribo-Zero kit intended for sample rRNA removal itself. We reasoned that this might be  
469 due to overall lower levels of translation (and therefore relatively less mRNA footprints) in kidney and  
470 decided to revert the steps and follow the original ribosome profiling protocol from Illumina. Total RNA  
471 libraries were prepared as previously described (Janich et al. 2015). RPF and RNA libraries were sequenced  
472 on an Illumina HiSeq 2500.

### 473 **Sequencing data processing, alignment and quantification**

474 Processing, quality assessment, alignment and quantification of sequencing data were performed as  
475 described in our previous study ((Janich et al. 2015; Janich et al. 2016)). Briefly, sequenced reads were  
476 trimmed of their adaptors using Cutadapt (Martin 2011) and the length distribution of trimmed reads was



477 used to assess the quality of nuclease digestion and size-selection steps, particularly important for RPF  
478 libraries (Supplemental Fig. S1B). Next trimmed reads were filtered by size (21-35 for RPF; 21-60 for RNA)  
479 using an in-house Python script, and sequentially mapped to mouse rRNA, human rRNA, mt-tRNA, mouse  
480 tRNA, mouse cDNA (Ensemble mouse database release 75) using Bowtie v2.2.1 (Langmead and Salzberg  
481 2012) and mouse genome (GRCm38.p2) using Tophat v2.0.11 (Trapnell et al. 2009). Trimmed and filtered  
482 sequences were also directly mapped against the mouse genome (using Tophat) in order to estimate  
483 expressed transcript models in each organ (using Cufflinks v2.2.1 (Trapnell et al. 2010). Transcriptome-  
484 mapping reads in the sequential alignment were counted towards their location into the 5' UTR, CDS or 3'  
485 UTR of the transcript, based on feature annotation (Ensemble mouse release 75). Mappable and  
486 countable feature lengths were not calculated for this study (see "faux reads analysis" in the  
487 "Quantification of mRNA and ribosome footprint abundance" section of (Janich et al. 2015) Supplemental  
488 Experimental Procedures) as its contribution was negligible for further analyses. Therefore RPKM  
489 calculations in this study were not corrected with such factor. Read counts in RNA-seq and RPF-seq  
490 datasets were normalized with upper quantile method of edgeR (Robinson and Oshlack 2010) and RPKM  
491 values were calculated as the number of reads per 1000 bases per geometric mean of normalized read  
492 counts per million. Relative translation efficiencies (TE) were calculated as the ratio of RPF-RPKM to RNA-  
493 RPKM per gene per sample. Reading frame and nucleotide periodicity analyses were done using the same  
494 criteria as in (Janich et al. 2015). Principal Component Analysis (PCA) was done using a combined matrix of  
495 CDS counts for RPF and RNA from both liver and kidney and following the same approach as before  
496 (Janich et al. 2015).

#### 497 **Correlation of RNA-seq and RPF-seq across organs**

498 Inter-organ correlation at the levels of RNA and RPF-seq (Fig. 2B) was done per timepoint and replicate.  
499 Significance of the difference in the spearman coefficient between both distributions was assessed by  
500 Wilcoxon rank sum test in R (stats package).

#### 501 **Analysis of differential translation efficiency**

502 Significance of differences in translation efficiency (TE) between liver and kidney was assessed using the  
503 Wilcoxon-rank sum test in R (stats package). A two-sided, paired test was performed on centered TE

504 values per timepoint and replicate, and resulted p-values were FDR-corrected. A gene was defined as  
505 having differential TE when  $FDR < 0.01$  and the inter-organ difference in TE was at least 1.5-fold (Fig. 2D).

### 506 **Analysis of transcript usage diversity across organs**

507 For each gene  $g$ ,  $P(g) = (p_1, \dots, p_n)$  is the vector of the relative expression proportions of its  $n$  protein-  
508 coding transcripts, as estimated in our RNA-seq analysis (see Sequencing data processing, alignment and  
509 quantification). To quantify the dissimilarity in relative transcript isoform expression between liver  $L$  and  
510 kidney  $K$ , the Hellinger distance  $H$  (Gonzalez-Porta et al. 2012) is defined as:

$$H(P_L(g), P_K(g)) = 1/\sqrt{2} \sqrt{\sum_{i=1}^n (\sqrt{p_{Li}} - \sqrt{p_{Ki}})^2} \quad (1)$$

511  
512 Similarity between the distribution of the genes detected as differentially translated (Fig. 2D) and the  
513 overall distribution was tested by two-sided two-sample Kolmogorov-Smirnov (KS) test. In order to detect  
514 the transcript feature that mostly determines the tissue specificity in translation efficiency, we selected  
515 genes whose transcript diversity in both organs originated only from either the 5' UTR, the CDS, or the 3'  
516 UTR of the transcripts, based on the annotation information for the protein-coding transcripts detected.  
517 Similarity of the "5' UTR-only diversity" distribution to the "CDS-only diversity" distribution was tested  
518 with the two-sided two-sample Kolmogorov-Smirnov (KS) test, although the low and very different  
519 number of genes in each group ( $n=216$  vs.  $n=117$ ) might limit the power of the test to detect a significant  
520 difference between the distributions.

### 521 **Rhythmicity analyses**

522 Rhythmicity detection and rhythmic parameters estimation in each dataset (RNA-seq and RPF-seq, liver  
523 and kidney) were done based on Akaike information criterion (AIC) model selection as in our previous  
524 study (Janich et al. 2015). The Babel computational framework (Olshen et al. 2013) was used to detect  
525 rhythmically translated genes from constantly expressed mRNAs within each organ.

### 526 **Hierarchical clustering of rhythmic genes**

527 In order to study the similarity of rhythmic genes based on their expression profiles, a dissimilarity matrix  
528 was computed for each gene of interest, based on the Euclidean distance between the RNA-seq and RPF-

529 seq expression profiles within and across organs. A hierarchical clustering tree was constructed on the  
530 weighted average of the dissimilarities matrices under consideration (core clock genes in Fig. 5D or all  
531 rhythmic genes in Fig. 5E), using the “average” clustering method. The R functions{packages} dist{stats},  
532 fuse{analogue} and hclust{stats} were used for computing the individual dissimilarity matrices, the  
533 weighted mean dissimilarity matrix, and the hierarchical clustering, respectively.

#### 534 **Upstream open reading frame (uORF) translation efficiency calculation**

535 In order to assess the impact of differential upstream ORFs (uORFs) usage on translation efficiency  
536 differences across organs, uORFs were identified as in our previous study (Janich et al. 2015). Briefly,  
537 genes expressing a single protein-coding isoform in both organs were selected (n=5815) and uORFs  
538 starting with an AUG and being at least 18 nucleotides long were considered as translated if they showed  
539 significant frame bias towards the first reading frame (relative to the uORF 5') and had a coverage >10%.  
540 uORF translation efficiency was calculated from the ratio of RPF-seq to RNA-seq reads on the uORF  
541 regions. If several uORFs partially or completely overlapped on a given transcript 5' UTR, a non-  
542 overlapping composite uORF was considered for read counting.

#### 543 **Data access**

544 The sequencing data from this study have been submitted to the NCBI Gene Expression Omnibus (GEO;  
545 <http://www.ncbi.nlm.nih.gov/geo/>) under accession number [available on request].

#### 546 **Acknowledgments**

547 We thank staff at the Lausanne Genomic Technologies Facility for high-throughput sequencing support  
548 and Ioannis Xenarios and staff at Vital-IT for computational support. D.G. was supported by Swiss National  
549 Science Foundation (professorship grants 128399, 157528); National Center for Competence in Research  
550 (NCCR) RNA & Disease; Fondation Pierre Mercier; Fondation Leenaards; Olga Mayenfisch Stiftung;  
551 SystemsX.ch StoNets consortium; and the University of Lausanne. P.J. was supported by Human Frontiers  
552 Science Program long-term fellowship LT000158/2013-L.

## 553 **References**

- 554 Atger F, Gobet C, Marquis J, Martin E, Wang J, Weger B, Lefebvre G, Descombes P, Naef F, Gachon F. 2015.  
555 Circadian and feeding rhythms differentially affect rhythmic mRNA transcription and translation in  
556 mouse liver. *Proceedings of the National Academy of Sciences of the United States of America* **112**:  
557 E6579-6588.
- 558 Bonny O, Vinciguerra M, Gumz ML, Mazzoccoli G. 2013. Molecular bases of circadian rhythmicity in renal  
559 physiology and pathology. *Nephrology, dialysis, transplantation : official publication of the*  
560 *European Dialysis and Transplant Association - European Renal Association* **28**: 2421-2431.
- 561 Brawand D, Soumillon M, Necsulea A, Julien P, Csardi G, Harrigan P, Weier M, Liechti A, Aximu-Petri A,  
562 Kircher M et al. 2011. The evolution of gene expression levels in mammalian organs. *Nature* **478**:  
563 343-348.
- 564 D'Alessandro M, Beesley S, Kim JK, Chen R, Abich E, Cheng W, Yi P, Takahashi JS, Lee C. 2015. A tunable  
565 artificial circadian clock in clock-defective mice. *Nature communications* **6**: 8587.
- 566 Dibner C, Schibler U, Albrecht U. 2010. The mammalian circadian timing system: organization and  
567 coordination of central and peripheral clocks. *Annual review of physiology* **72**: 517-549.
- 568 Dunlap JC. 1996. Genetics and molecular analysis of circadian rhythms. *Annu Rev Genet* **30**: 579-601.
- 569 Gonzalez-Porta M, Calvo M, Sammeth M, Guigo R. 2012. Estimation of alternative splicing variability in  
570 human populations. *Genome research* **22**: 528-538.
- 571 Gu X, Xing L, Shi G, Liu Z, Wang X, Qu Z, Wu X, Dong Z, Gao X, Liu G et al. 2012. The circadian mutation  
572 PER2(S662G) is linked to cell cycle progression and tumorigenesis. *Cell death and differentiation*  
573 **19**: 397-405.
- 574 Ingolia NT. 2014. Ribosome profiling: new views of translation, from single codons to genome scale.  
575 *Nature reviews Genetics* **15**: 205-213.
- 576 Ingolia NT, Lareau LF, Weissman JS. 2011. Ribosome profiling of mouse embryonic stem cells reveals the  
577 complexity and dynamics of mammalian proteomes. *Cell* **147**: 789-802.
- 578 Jang C, Lahens NF, Hogenesch JB, Sehgal A. 2015. Ribosome profiling reveals an important role for  
579 translational control in circadian gene expression. *Genome research* **25**: 1836-1847.

- 580 Janich P, Arpat AB, Castelo-Szekely V, Gatfield D. 2016. Analyzing the temporal regulation of translation  
581 efficiency in mouse liver. *Genomics data* **8**: 41-44.
- 582 Janich P, Arpat AB, Castelo-Szekely V, Lopes M, Gatfield D. 2015. Ribosome profiling reveals the rhythmic  
583 liver translome and circadian clock regulation by upstream open reading frames. *Genome*  
584 *research* **25**: 1848-1859.
- 585 Jouffe C, Cretenet G, Symul L, Martin E, Atger F, Naef F, Gachon F. 2013. The circadian clock coordinates  
586 ribosome biogenesis. *PLoS biology* **11**: e1001455.
- 587 Khan Z, Ford MJ, Cusanovich DA, Mitrano A, Pritchard JK, Gilad Y. 2013. Primate transcript and protein  
588 expression levels evolve under compensatory selection pressures. *Science* **342**: 1100-1104.
- 589 Kojima S, Sher-Chen EL, Green CB. 2012. Circadian control of mRNA polyadenylation dynamics regulates  
590 rhythmic protein expression. *Genes & development* **26**: 2724-2736.
- 591 Landgraf D, Wang LL, Diemer T, Welsh DK. 2016. NPAS2 Compensates for Loss of CLOCK in Peripheral  
592 Circadian Oscillators. *PLoS genetics* **12**: e1005882.
- 593 Langmead B, Salzberg SL. 2012. Fast gapped-read alignment with Bowtie 2. *Nature methods* **9**: 357-359.
- 594 Le Martelot G, Claudel T, Gatfield D, Schaad O, Kornmann B, Lo Sasso G, Moschetta A, Schibler U. 2009.  
595 REV-ERB $\alpha$  participates in circadian SREBP signaling and bile acid homeostasis. *PLoS biology* **7**:  
596 e1000181.
- 597 Lee Y, Chen R, Lee HM, Lee C. 2011. Stoichiometric relationship among clock proteins determines  
598 robustness of circadian rhythms. *The Journal of biological chemistry* **286**: 7033-7042.
- 599 Li JJ, Biggin MD. 2015. Gene expression. Statistics requantitates the central dogma. *Science* **347**: 1066-  
600 1067.
- 601 Liu Y, Beyer A, Aebersold R. 2016. On the Dependency of Cellular Protein Levels on mRNA Abundance. *Cell*  
602 **165**: 535-550.
- 603 Luck S, Westermark PO. 2016. Circadian mRNA expression: insights from modeling and transcriptomics.  
604 *Cellular and molecular life sciences : CMLS* **73**: 497-521.
- 605 Martin M. 2011. Cutadapt removes adapter sequences from high-throughput sequencing reads.  
606 *EMBnetjournal* **17**: 10-12.

- 607 Mauvoisin D, Wang J, Jouffe C, Martin E, Atger F, Waridel P, Quadroni M, Gachon F, Naef F. 2014.  
608 Circadian clock-dependent and -independent rhythmic proteomes implement distinct diurnal  
609 functions in mouse liver. *Proceedings of the National Academy of Sciences of the United States of*  
610 *America* **111**: 167-172.
- 611 McManus CJ, May GE, Spealman P, Shteyman A. 2014. Ribosome profiling reveals post-transcriptional  
612 buffering of divergent gene expression in yeast. *Genome research* **24**: 422-430.
- 613 Meireles-Filho AC, Bardet AF, Yanez-Cuna JO, Stampfel G, Stark A. 2014. cis-Regulatory Requirements for  
614 Tissue-Specific Programs of the Circadian Clock. *Current biology : CB* **24**: 1-10.
- 615 Olshen AB, Hsieh AC, Stumpf CR, Olshen RA, Ruggero D, Taylor BS. 2013. Assessing gene-level translational  
616 control from ribosome profiling. *Bioinformatics* **29**: 2995-3002.
- 617 Partch CL, Green CB, Takahashi JS. 2014. Molecular architecture of the mammalian circadian clock. *Trends*  
618 *in cell biology* **24**: 90-99.
- 619 Raspe E, Duez H, Mansen A, Fontaine C, Fievet C, Fruchart JC, Vennstrom B, Staels B. 2002. Identification  
620 of Rev-erbalpha as a physiological repressor of apoC-III gene transcription. *J Lipid Res* **43**: 2172-  
621 2179.
- 622 Reddy AB, Karp NA, Maywood ES, Sage EA, Deery M, O'Neill JS, Wong GK, Chesham J, Odell M, Lilley KS et  
623 al. 2006. Circadian orchestration of the hepatic proteome. *Current biology : CB* **16**: 1107-1115.
- 624 Robinson MD, Oshlack A. 2010. A scaling normalization method for differential expression analysis of RNA-  
625 seq data. *Genome biology* **11**: R25.
- 626 Robles MS, Cox J, Mann M. 2014. In-vivo quantitative proteomics reveals a key contribution of post-  
627 transcriptional mechanisms to the circadian regulation of liver metabolism. *PLoS genetics* **10**:  
628 e1004047.
- 629 Schafer S, Adami E, Heinig M, Rodrigues KE, Kreuchwig F, Silhavy J, van Heesch S, Simaite D, Rajewsky N,  
630 Cuppen E et al. 2015. Translational regulation shapes the molecular landscape of complex disease  
631 phenotypes. *Nature communications* **6**: 7200.

- 632 Schrimpf SP, Weiss M, Reiter L, Ahrens CH, Jovanovic M, Malmstrom J, Brunner E, Mohanty S, Lercher MJ,  
633 Hunziker PE et al. 2009. Comparative functional analysis of the *Caenorhabditis elegans* and  
634 *Drosophila melanogaster* proteomes. *PLoS biology* **7**: e48.
- 635 Schwanhausser B, Busse D, Li N, Dittmar G, Schuchhardt J, Wolf J, Chen W, Selbach M. 2011. Global  
636 quantification of mammalian gene expression control. *Nature* **473**: 337-342.
- 637 Trapnell C, Pachter L, Salzberg SL. 2009. TopHat: discovering splice junctions with RNA-Seq. *Bioinformatics*  
638 **25**: 1105-1111.
- 639 Trapnell C, Williams BA, Pertea G, Mortazavi A, Kwan G, van Baren MJ, Salzberg SL, Wold BJ, Pachter L.  
640 2010. Transcript assembly and quantification by RNA-Seq reveals unannotated transcripts and  
641 isoform switching during cell differentiation. *Nature biotechnology* **28**: 511-515.
- 642 Wethmar K. 2014. The regulatory potential of upstream open reading frames in eukaryotic gene  
643 expression. *Wiley interdisciplinary reviews RNA* **5**: 765-778.
- 644 Yagita K, Horie K, Koinuma S, Nakamura W, Yamanaka I, Urasaki A, Shigeyoshi Y, Kawakami K, Shimada S,  
645 Takeda J et al. 2010. Development of the circadian oscillator during differentiation of mouse  
646 embryonic stem cells in vitro. *Proceedings of the National Academy of Sciences of the United*  
647 *States of America* **107**: 3846-3851.
- 648 Yoo SH, Yamazaki S, Lowrey PL, Shimomura K, Ko CH, Buhr ED, Siepack SM, Hong HK, Oh WJ, Yoo OJ et al.  
649 2004. PERIOD2::LUCIFERASE real-time reporting of circadian dynamics reveals persistent circadian  
650 oscillations in mouse peripheral tissues. *Proceedings of the National Academy of Sciences of the*  
651 *United States of America* **101**: 5339-5346.
- 652 Zhang R, Lahens NF, Ballance HI, Hughes ME, Hogenesch JB. 2014. A circadian gene expression atlas in  
653 mammals: Implications for biology and medicine. *Proceedings of the National Academy of*  
654 *Sciences of the United States of America* **111**: 16219-16224.
- 655

1 **SUPPLEMENTAL MATERIAL**

2 **Translational contributions to tissue-specificity in rhythmic and constitutive gene**  
3 **expression**

4 Violeta Castelo-Szekely, Alaaddin Bulak Arpat, Peggy Janich, David Gatfield



5 **Figure S1. Outcome of ribosome profiling around-the-clock in mouse liver and kidney.**

6 **A)** Summary of the sequential mapping outcome, indicating the number (y-axis) and percentage  
7 (within bars) of reads mapping to each database, averaged over all timepoints. For each library  
8 of the four datasets an average of more than 20 million reads aligned to cDNA.

9 **(B, C)** RPF-seq (B) and RNA-seq (C) read lengths after trimming of adaptors showed that RPF-seq  
10 reads were mostly 29-30 nucleotides in both organs, whereas RNA-seq fragments showed a  
11 broader distribution as expected from chemical RNA fragmentation. Boxplots represent the  
12 interquartile range and whiskers extend to the minimum and maximum value within 1.5 times  
13 the interquartile range.

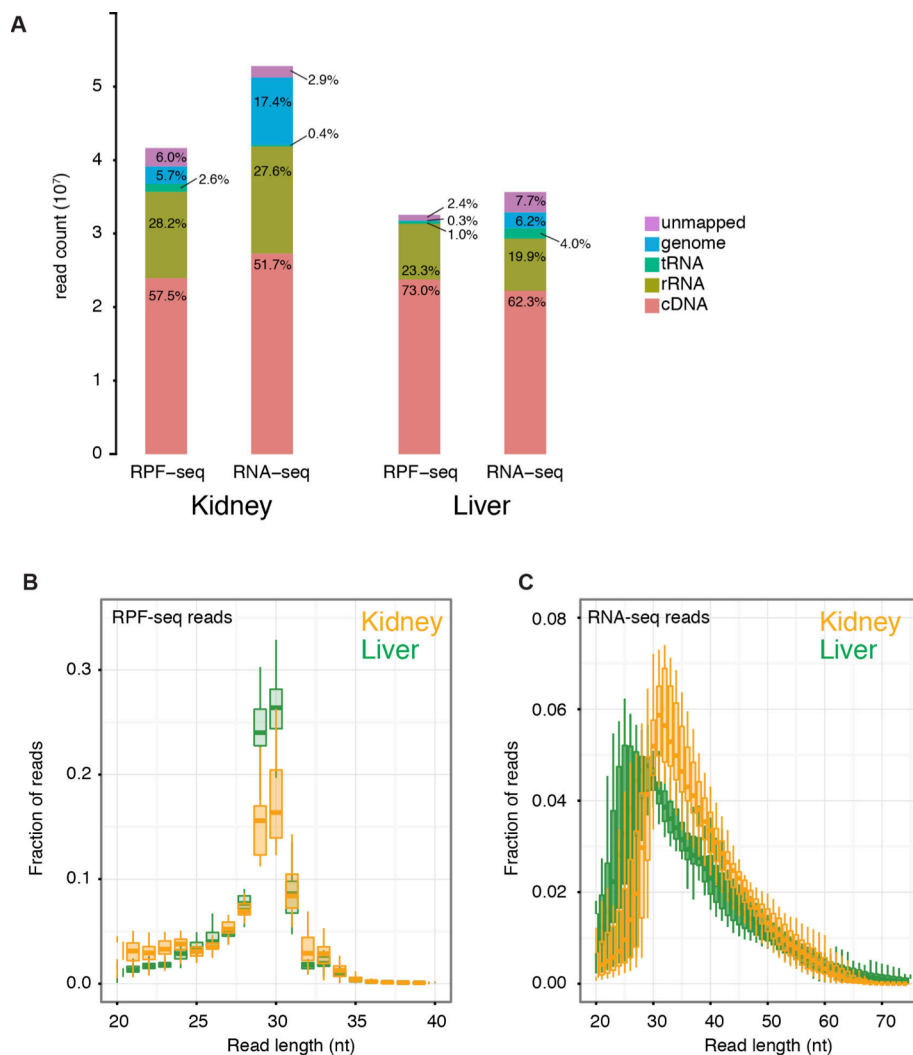

14 **Figure S2. High reproducibility of the datasets.**

15 **(A, B)** Spearman correlation of normalized CDS read counts between timepoints and between  
 16 replicates for kidney RPF-seq (A) and kidney RNA-seq (B) datasets. Correlation coefficient is  
 17 indicated by the size and intensity of the disks.

18 **(C, D)** Normalized CDS read counts (RPKM) in liver vs. kidney at the RNA-seq (C) and RPF-seq  
 19 level (D), plotted as averages over all timepoints. Note the overall higher Spearman correlation  
 20 at the footprint level than mRNA level.

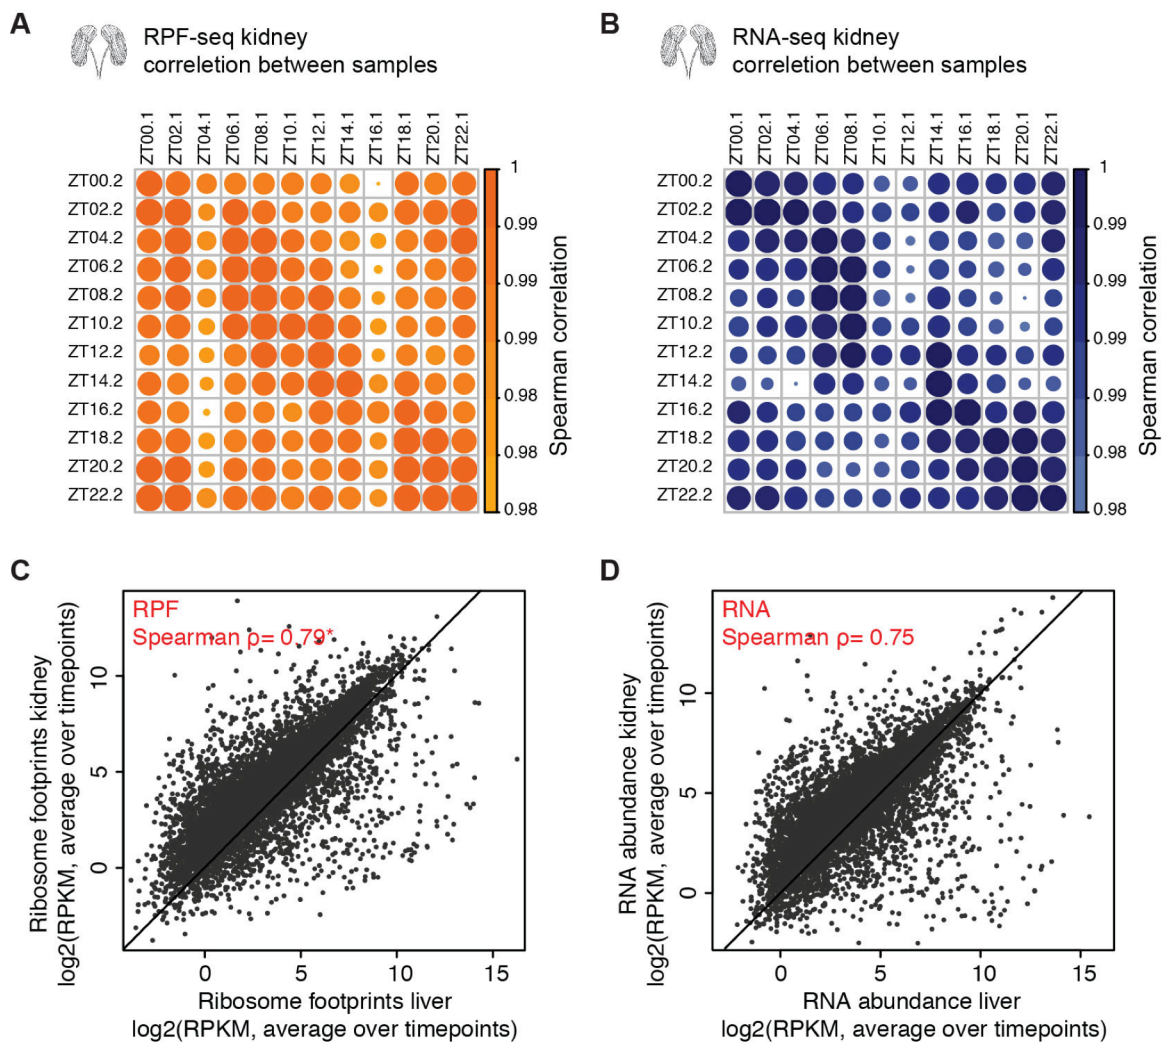

\* correlations are significantly different  
 Steiger test for difference between 2 dependent correlations, Z value=-22.23, p=8.7e-110 (n=10289)

Steiger, J. H. (1980). Tests for comparing elements of a correlation matrix. Psychological Bulletin, 87, 245-251.

21 **Figure S3. Principal component analysis across datasets.**

22 **(A)** Scree plot of the first 10 principal components of the PCA in Fig. 1D. Components 4 and 5  
23 explained a closely similar proportion of variation (between 5-6%) and a plateau was reached  
24 from component 6.

25 **(B)** Principal component (PC) 3 vs. PC4 of the PCA. PC4 clustered RPF-seq data of one organ with  
26 RNA-seq data of the other, hinting towards translational buffering as a relevant mechanism  
27 impinging on variability in gene expression across organs. Each dot represents a timepoint  
28 sample, replicates are joined by a line and timepoints within each dataset are sequentially  
29 colored.

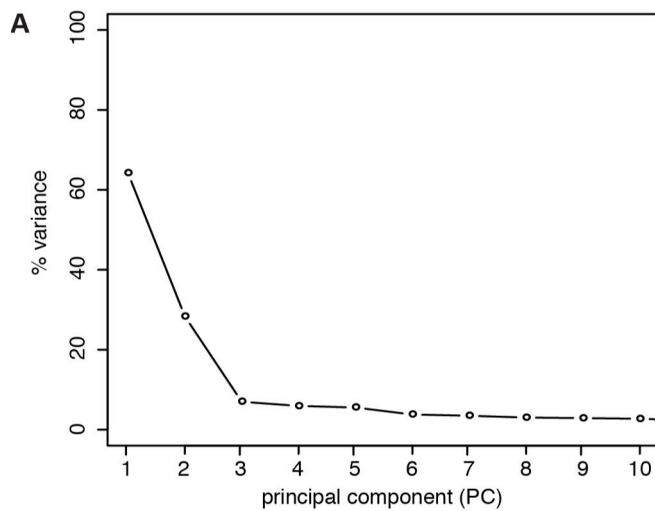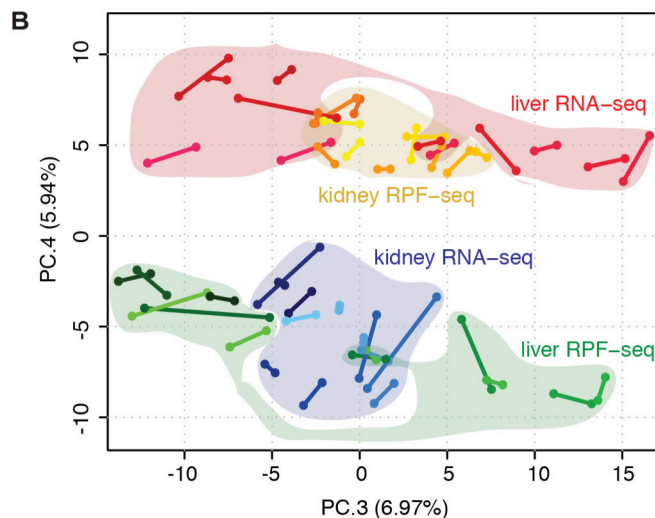

30 **Figure S4. Contribution of translation efficiency to protein biosynthesis within organs.**

31 **(A, B)** Scatterplot of mRNA abundance vs. translation efficiency (TE) in kidney (A) and liver (B)  
32 averaged over all timepoints (N=12423 and N=10676 genes, respectively). Corresponding  
33 density lines are plotted on the margins. Dotted red lines represent the 2.5 and 97.5 percentiles  
34 of each variable, and the corresponding fold-change is indicated. Transcript abundance range for  
35 95% of genes spanned 2-3 orders of magnitude, whereas TE dynamic range was less than 12-  
36 fold in either organ, suggesting the

37 former as the main contributor to  
38 gene expression variability within  
39 tissues.

40 **(C)** Scatterplot of mRNA abundance  
41 (TA) vs. translation efficiency (TE) in  
42 kidney, averaged over all timepoints.  
43 Highlighted are single protein-coding  
44 genes that do (red) or do not (blue)  
45 contain AUG-initiated translated  
46 uORFs. Corresponding density lines  
47 are plotted on the margins. uORF  
48 translation is associated with  
49 significantly reduced translation  
50 efficiency, but not with a strong effect  
51 on mRNA level. Numbers on the  
52 density curves indicate the location  
53 shift (difference of the distribution

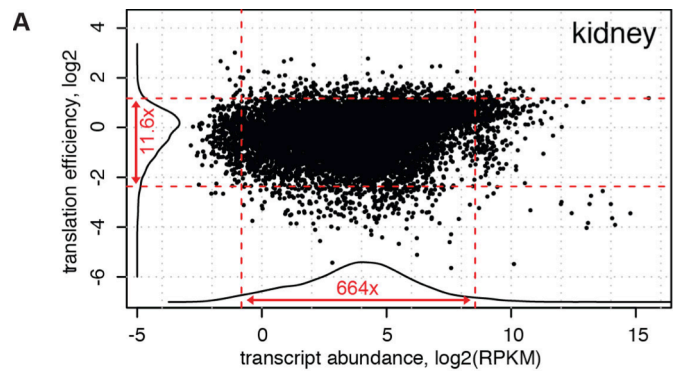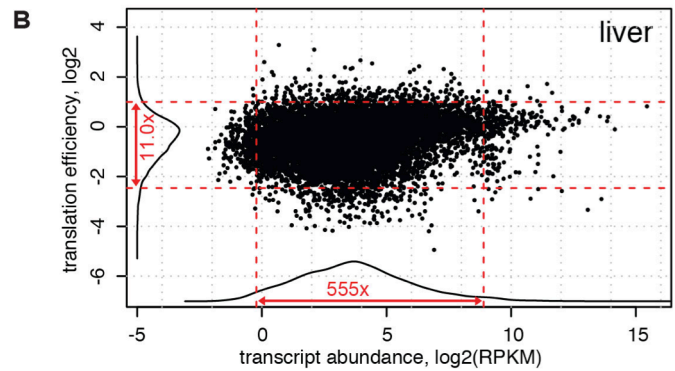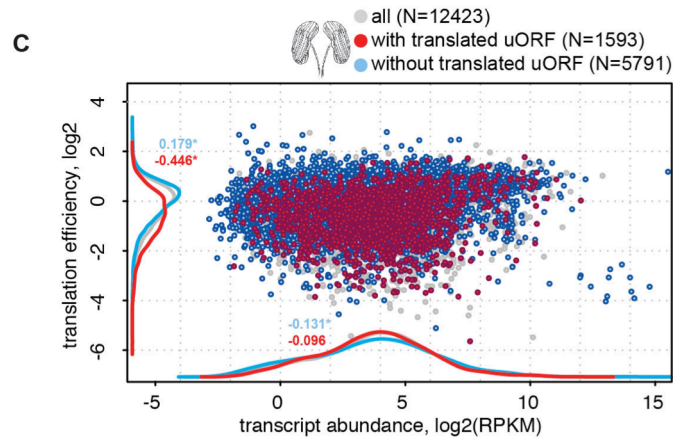

54 medians) relative to all transcripts. Genes with translated uORFs: TA,  $p=0.16$ ; TE,  $p<2.2e-16$   
55 (Wilcoxon rank sum test). Genes without translated uORFs: TA,  $p=8.7e-05$ ; TE,  $p<2.2e-16$   
56 (Wilcoxon rank sum test).

57 **Figure S5. Phase and amplitude relationships for RNA and RPF in both organs.**

58 **(A)** Scatterplot of phase differences at the RNA (x-axis) vs. the RPF (y-axis) levels between kidney  
59 and liver for the genes rhythmic throughout (n=178). Clock genes are highlighted in red. The  
60 blue diagonal line represents the linear regression. Note that the phase concordance between  
61 organs is larger at the footprint level than at the mRNA level (i.e., the blue line is less steep than  
62 the grey dashed line that marks the 1:1 relationship).

63 **(B, C)** Histogram of the phase differences (footprints to mRNA abundance, in hours) in kidney (B)  
64 and liver (C) for the 178 genes rhythmic in both organs. Note the broader distribution of phase  
65 differences in kidney and an average phase advance of RPF with respect to RNA (0.143 hours) as  
66 opposed to an overall more synchronous phase of RPF and RNA in liver. See also Fig. 3B, E.

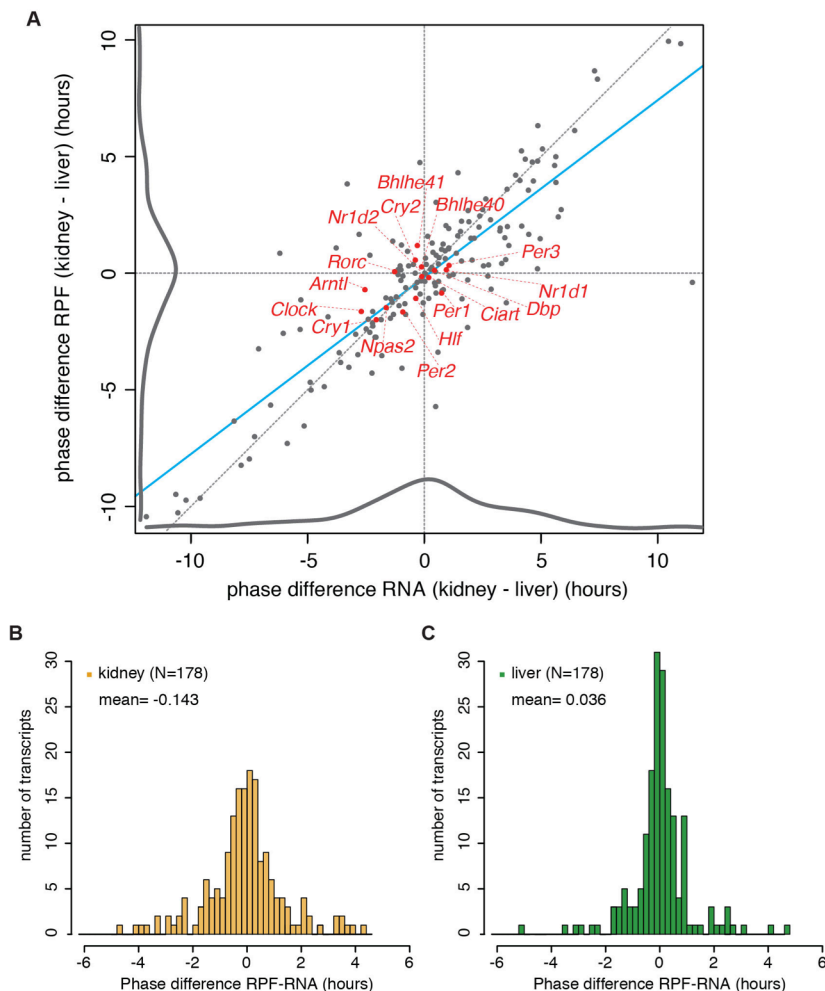

67 **Figure S6. Higher expression of deadenylase complex subunits in kidney.**

68 **(A, B)** Daily expression  
 69 profiles of the CCR4-NOT  
 70 complex components in  
 71 kidney (A) and liver (B). Note  
 72 that for all but one subunit,  
 73 the daily expression is higher  
 74 in kidney than in liver.  
 75 **(C)** RPF expression of the  
 76 CCR4-NOT subunits averaged  
 77 over the day. Boxplots  
 78 represent the interquartile  
 79 range and whiskers extend to  
 80 the minimum and maximum  
 81 TE within 1.5 times the  
 82 interquartile range. Note that  
 83 differences in protein  
 84 biosynthesis are statistically  
 85 significant for all but one of  
 86 the subunits ( $p < 0.05$ , two-  
 87 sample t-test).

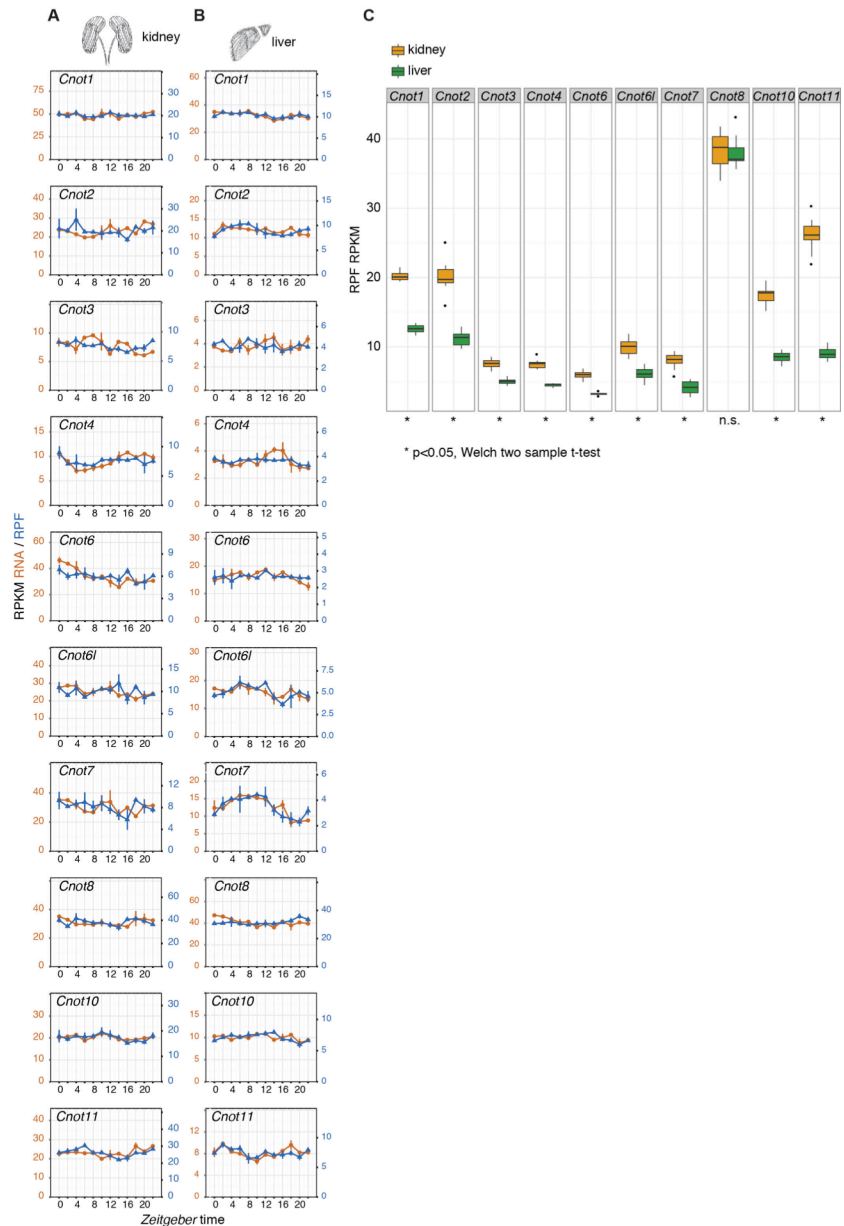

88 **Figure S7. Heatmaps of all detected RPF and RNA rhythms indicates false-negatives of**  
 89 **rhythmicity detection method.**

90 **(A)** Same as Fig. 3A, but re-plotted here for ease of comparison with (B-D).

91 **(B-D)** Heatmap of RNA-seq (left panels) and RPF-seq (right panels) expression in kidney for genes  
 92 detected as rhythmic only at the mRNA level (B, n=796), at both levels (C, n=542), and for the  
 93 ribosome footprints only (D, n=435). Gene expression levels are standardized by row (gene).  
 94 Even the panels that should represent “non-rhythmicity” (i.e. right panel in B and left panel in D)  
 95 clearly show underlying rhythmicity, albeit with more noise and/or lower amplitude. Many of  
 96 these cases are therefore probably not truly “non-rhythmic”, indicating that the conventional  
 97 rhythmicity detection is prone to false negatives, as described in the main text.

**A** rhythmic in kidney

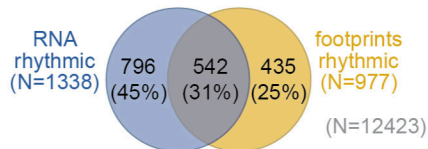

**B** “RNA only” rhythmic (796 genes)

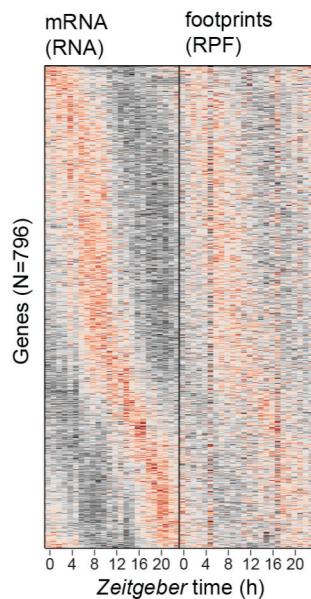

**C** RNA and RPF rhythmic (542 genes)

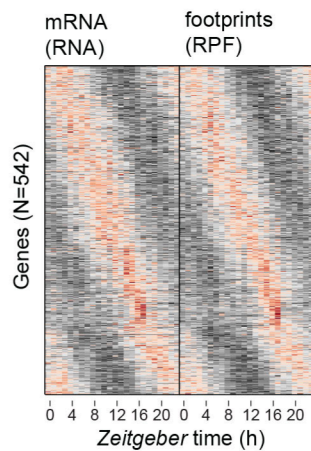

**D** “footprints only” rhythmic (435 genes)

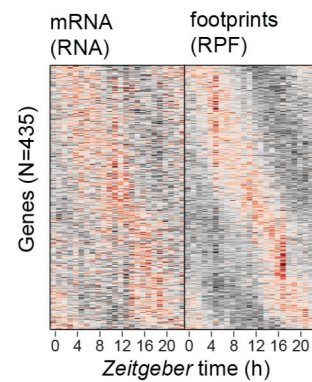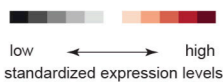



98 **Figure S8. Core clock gene expression at RNA and RPF levels in both organs.**

99 **Left panels:** Daily  
 100 expression profiles of  
 101 the main core clock  
 102 genes shown in Fig. 5A-  
 103 D.  
 104 **Right panels:**  
 105 Hierarchical clustering  
 106 of the organs' RNA and  
 107 RPF profiles for each  
 108 clock gene. Branch  
 109 height represents the  
 110 average Euclidean  
 111 distance. Note that for  
 112 7 out of the 12 core  
 113 clock genes, protein  
 114 synthesis profiles are  
 115 more similar across  
 116 organs than mRNA  
 117 abundance and than  
 118 RPF-RNA within organs.

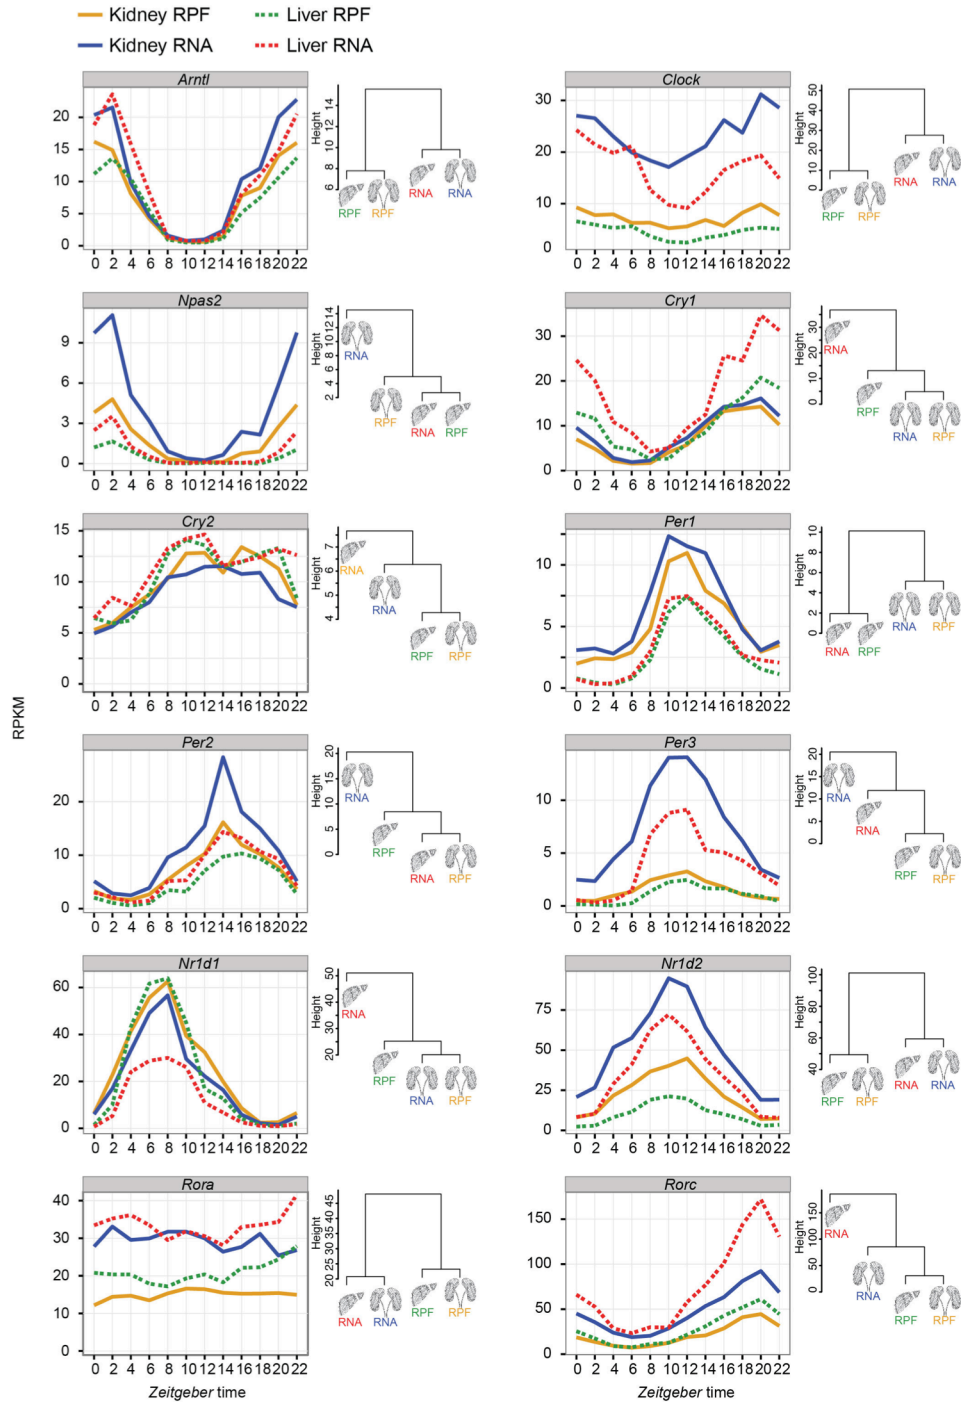

Source: http://biorxiv.org/content/10.1101/060368v1.full.pdf
